# Supplementary material for: Toward the search for new photosensitizers for DSSCs: theoretical study of both substituted Zn(ii) and Si(iv) phthalocyanines
Source: Royal Society of Chemistry journal article supplement (doi:10.1039/d3cp04417c), 2024-01-01
Supplement: d3cp04417c1.pdf [file d3cp04417c1.pdf]

## Supplementary Material

### Toward the Searching for New Photosensitizers for DSSC: Theoretical Study of Both Substituted Zinc (II) and Si (IV) Phthalocyanines

Michael Zambrano-Angulo<sup>a</sup>, and Gloria Cárdenas-Jirón<sup>\*a</sup>

<sup>a</sup>Laboratory of Theoretical Chemistry, Faculty of Chemistry and Biology, University of  
Santiago de Chile (USACH), Santiago, Chile

\*Corresponding author: [gloria.cardenas@usach.cl](mailto:gloria.cardenas@usach.cl)

#### Table of Contents

|                                                                                                                                                                                                                                               |    |
|-----------------------------------------------------------------------------------------------------------------------------------------------------------------------------------------------------------------------------------------------|----|
| <b>S1. Molecular structure of phthalocyanines</b> .....                                                                                                                                                                                       | 2  |
| <b>S2. Electronic properties of metal phthalocyanines</b> .....                                                                                                                                                                               | 10 |
| <b>Figure S1.</b> Energy values of the frontier molecular orbitals for ZnPc y SiPc with carboxyl ( <b>B</b> ) and catechol ( <b>C</b> ) anchoring groups. ....                                                                                | 14 |
| <b>Figure S2.</b> Surfaces of frontier molecular orbitals for <b>9B</b> (carboxyl anchor group) and <b>9C</b> (catechol anchor group) calculated in the solution phase. ....                                                                  | 15 |
| <b>Figure S3.</b> Surfaces of molecular electrostatic potential mapped into the charge density isosurface of 0.002 electrons/bohr <sup>3</sup> for MPcs with carboxyl (B) and catechol (C) anchoring group and without substituents. ....     | 16 |
| <b>Figure S4.</b> UV-Vis spectra calculated by TD-DFT with the <b>carboxyl anchor group</b> as the anchoring group. Left: ZnPc, Right: SiPc. The excitations corresponding to the Q-band region are included in the center of the figure..... | 17 |
| <b>Figure S5.</b> UV-Vis spectra calculated by TD-DFT with the <b>catechol anchor group</b> as the anchoring group. Left: ZnPc, Right: SiPc. The excitations corresponding to the Q-band region are included in the center of the figure..... | 18 |
| <b>Table S1.</b> Adsorption ( $E_{\text{ads}}$ ) and interaction ( $E_{\text{int}}$ ) energies calculated at the molecular level at the GGA-PBE/Double $\zeta$ basis set/PseudDojo theory level.....                                          | 19 |
| <b>Table S2.</b> Comparison of some properties for systems adsorbed on different TiO <sub>2</sub> surfaces.....                                                                                                                               | 19 |
| <b>Figure S6.</b> Surfaces of the frontier molecular orbitals calculated for the interaction dye-TiO <sub>2</sub> . ....                                                                                                                      | 21 |

## S1. Molecular structure of phthalocyanines

Initially, to verify that the level of theory chosen is reliable for the systems to be evaluated, two similar systems reported experimentally were selected, which are a ZnPc without substituents and a SiPc with substituents in axial position. These systems were optimized to the B3LYP/6-31G(d,p) level of theory, adding the Grimme dispersion (D3). Comparing the values of the bond distances and bond angles of the experimentally reported systems with those obtained theoretically, a Root Mean Square Deviation (RMSD) value of 0.074 Å was obtained for the bond distances and 0.70° for the bond angles in the case of ZnPc. On the other hand, silicon-based phthalocyanines predict RMSD values of 0.019 Å and 2.18° for distances and bond angles, respectively. These results demonstrate that the choice of the level of theory for the description of the structure of the systems to be evaluated is optimal and generates reliable results.

Once the functional was chosen, we performed the complete geometry optimization of each phthalocyanine in the gas phase using the hybrid functional B3LYP with the basis set 6-31G(d,p) and Grimme dispersion correction (D3). A set of 33 substituted **ZnPc** species and 33 substituted **SiPc** species were investigated. For each metal, we optimize three sets of 11 compounds, each one that differs in the anchoring group ( $R_2$ , Scheme 1); anhydrous (**A**), carboxyl (**B**), and catechol (**C**), and with a singlet spin multiplicity and a neutral total charge.

---

### ZnPc-Anhydrous (A)

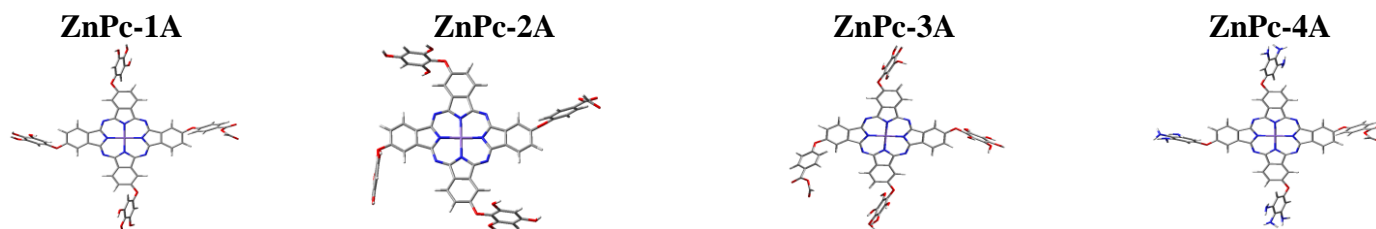

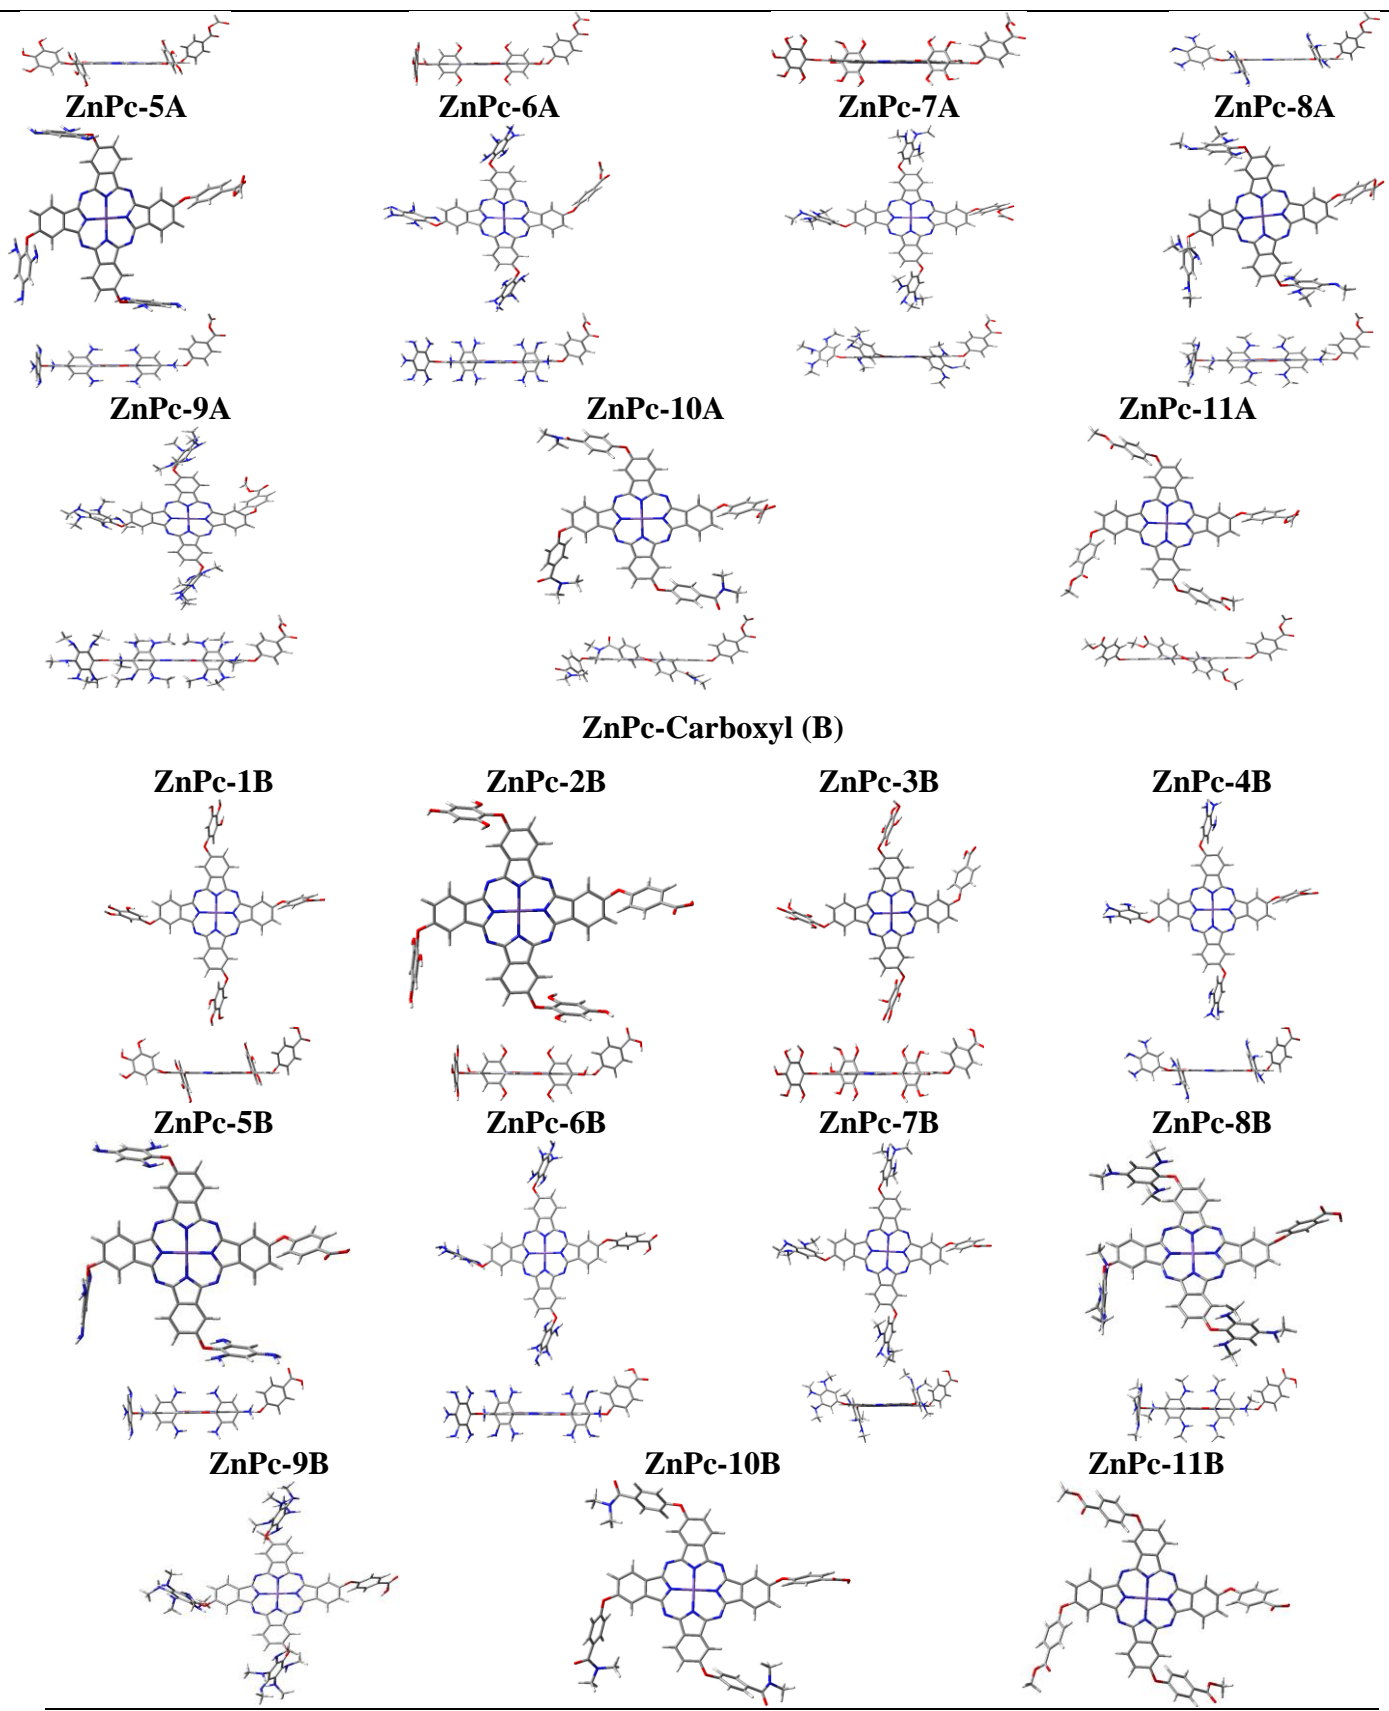

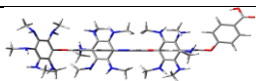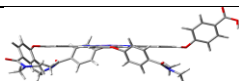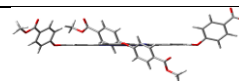

**ZnPc-Catechol (C)**

**ZnPc-1C**

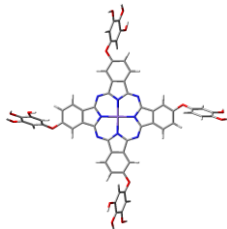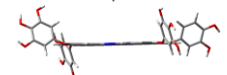

**ZnPc-2C**

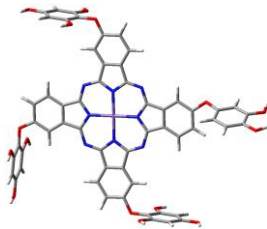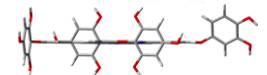

**ZnPc-3C**

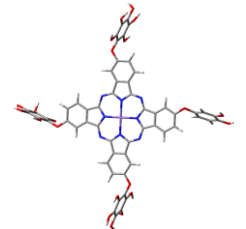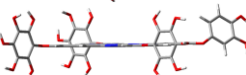

**ZnPc-4C**

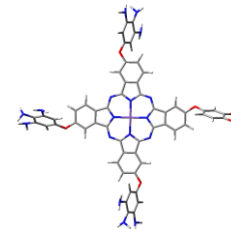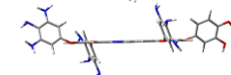

**ZnPc-5C**

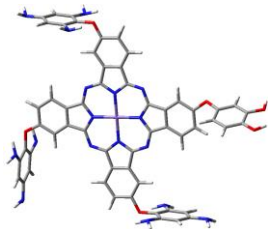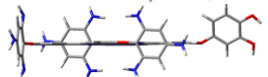

**ZnPc-6C**

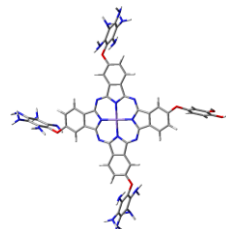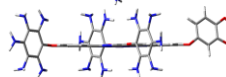

**ZnPc-7C**

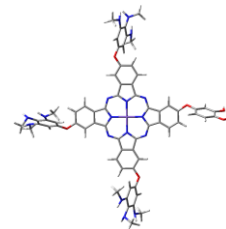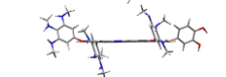

**ZnPc-8C**

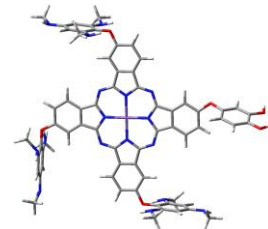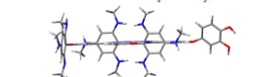

**ZnPc-9C**

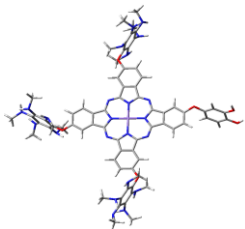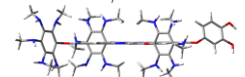

**ZnPc-10C**

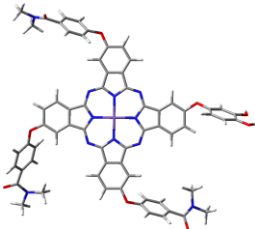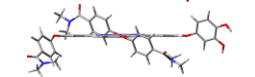

**ZnPc-11C**

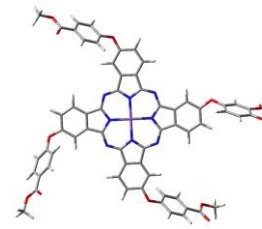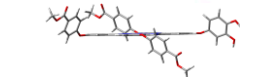

**SiPc-Anhydrous (A)**

**SiPc-1A**

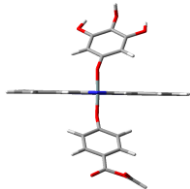

**SiPc-2A**

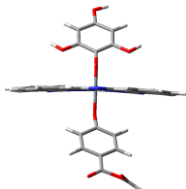

**SiPc-3A**

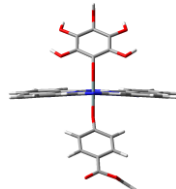

**SiPc-4A**

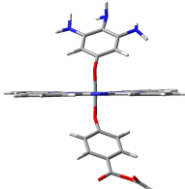

**SiPc-5A**

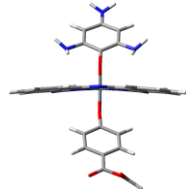

**SiPc-6A**

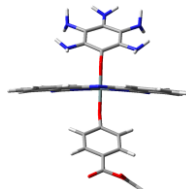

**SiPc-7A**

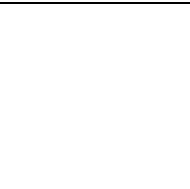

**SiPc-8A**

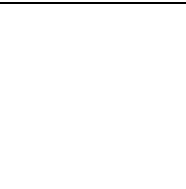

**SiPc-9A**

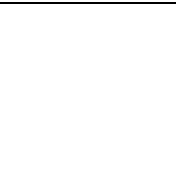

**SiPc-10A**



**SiPc-11A**



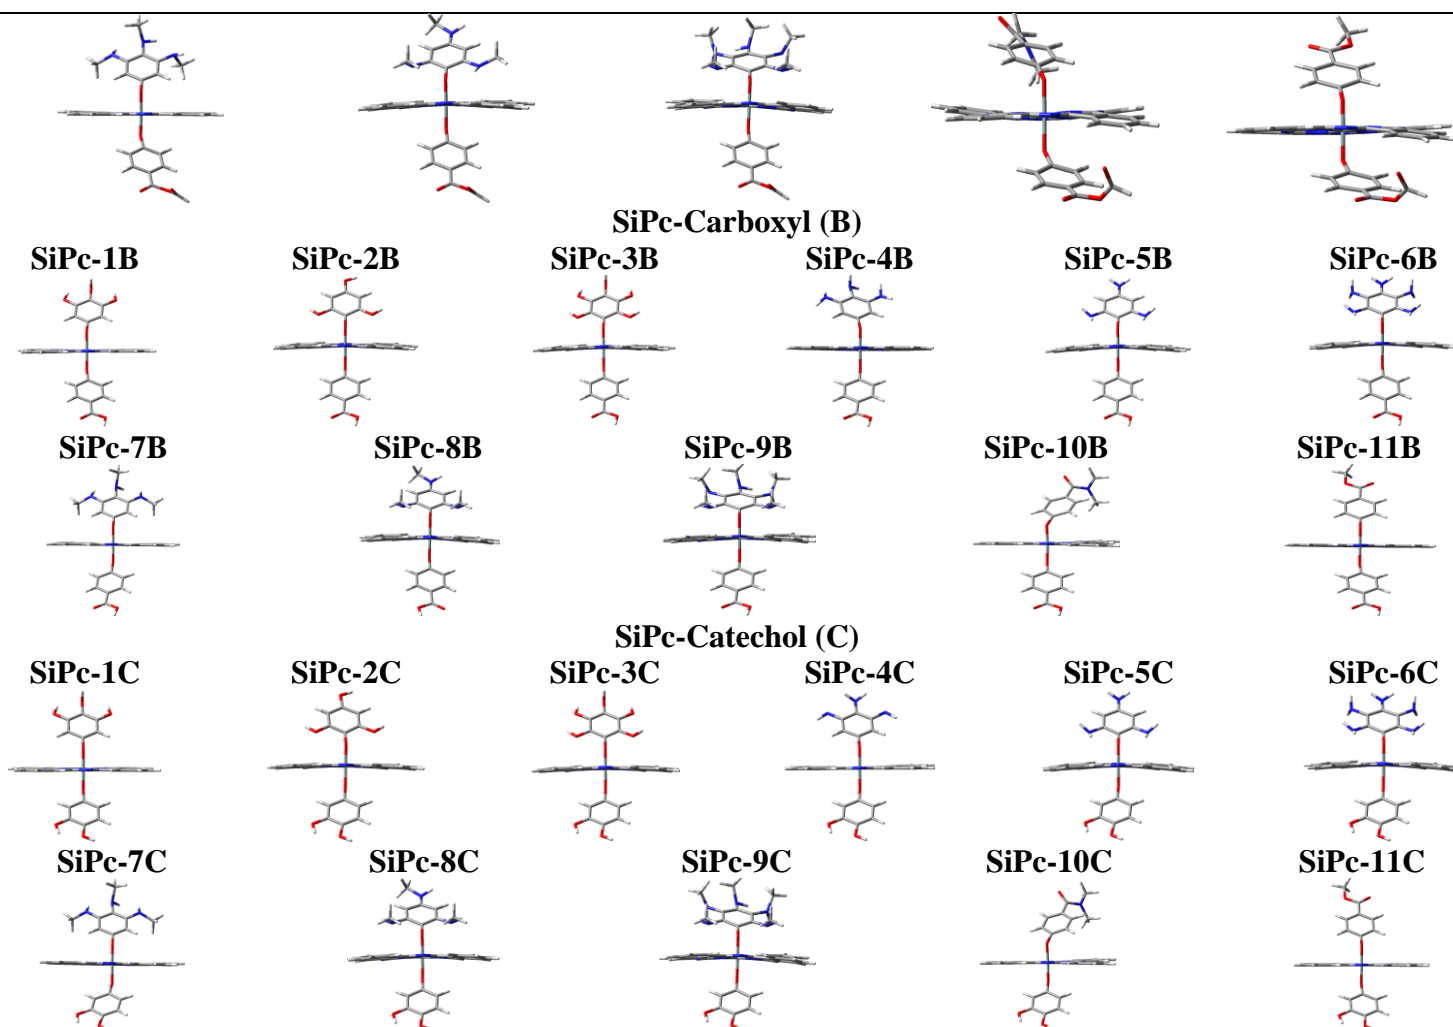

**Figure SI.** Molecular structures of **ZnPc** and **SiPc** with an anhydrous (**A**), carboxyl (**B**) and catechol (**C**) optimized at B3LYP/6-31G(d,p)/D3 level of theory.

The optimized species are presented in Figure SI. Those results were confirmed that are minimum energy states through the calculation of the vibrational frequencies where in all cases, positive values were obtained. For both metals, the phthalocyanine core is planar, and the substituents are located above and below the plane of the macrocycle, thus generating non-planar structures with less tendency to aggregation and, therefore, greater solubility. This effect is more significant in silicon phthalocyanines due to the axial position of the substituents, which allows for this metal to have a coordination of octahedral.

To simplify the analysis, we select the bonds N-metal, where N is the isoindoline nitrogen atom (Figure SII). The optimized bond distances (N-metal) for all the structures are compared with those reported experimentally for **ZnPc** without substituents and **SiPc** with substitution in the axial position by phenoxy groups. The theoretical values of the bond distances N-Zn and N-Si are compared with the experimental reported; 1.97 and 1.92 Å for the N-Zn and N-Si bonds, respectively. As for the systems without any type of substitution (**ZnPc** and **SiPcCl<sub>2</sub>**), the bond distances between the central atom and the nitrogens of the macrocycle were similar to those obtained with the substitutions evaluated, where for silicon a bond distance of 1,92 Å was found, which was shorter than the 1,90 Å found for zinc.

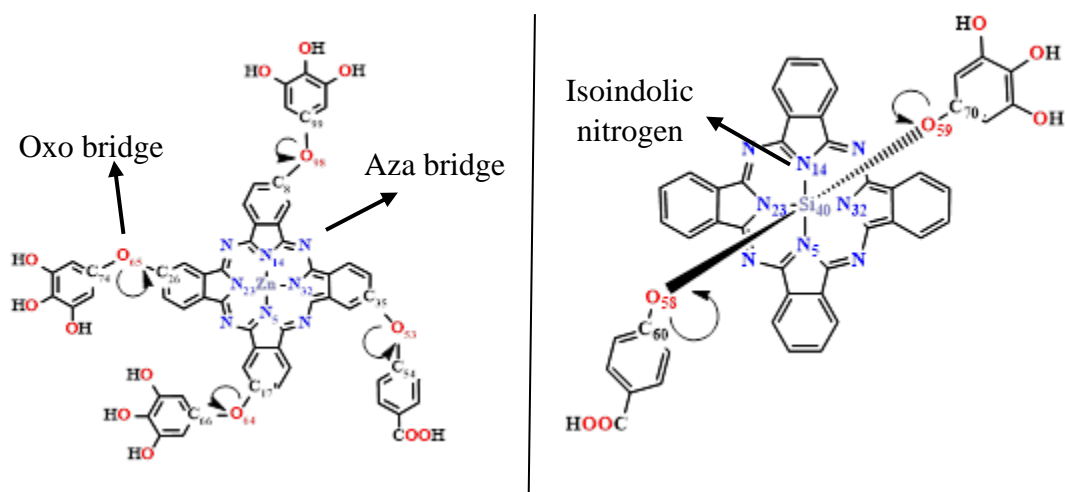

**Figure SII.** Atoms labels for the substituted MPcs. Left: **ZnPc**. Right: **SiPc**.

The angles that involve the substituent group and anchoring group are also shown. Table SI shows the results for substituted **ZnPc** and **SiPc** with three anchoring groups ( $R_2$ ). As can be seen in Table SI, the results obtained for the distances between isoindoline nitrogen and the central atom for both systems are very close to the experimental data, obtaining an error of 1.01 % in the case of zinc phthalocyanines and a smaller value for their silicon

analogues (0.48 %). The results shown are for systems with anhydrous as the anchor group; however, for anchoring groups, carboxyl (**B**) and catechol (**C**) presented an error of 1.01 and 1.02 %, respectively, in the case of ZnPc and 0.61 (**B**) and 0.70 (**C**) for SiPc systems. Finally, these values demonstrate once again that the choice of the level of theory was suitable.

**Table SI.** Main structural parameters calculated for **1A** of both MPCs. Distances in angstroms (Å) and angles are reported in degrees (°).

| <b>ZnPc 1A</b>                    |       |                                                   |         | <b>SiPc 1A</b>                    |       |                                                    |        |
|-----------------------------------|-------|---------------------------------------------------|---------|-----------------------------------|-------|----------------------------------------------------|--------|
| Distance (Å)                      |       | Angles (°)                                        |         | Distance (Å)                      |       | Angles (°)                                         |        |
| N <sub>5</sub> -Zn <sub>41</sub>  | 1.991 | C <sub>8</sub> -O <sub>98</sub> -C <sub>99</sub>  | 120.38  | N <sub>5</sub> -Si <sub>41</sub>  | 1.930 | Si <sub>41</sub> -O <sub>59</sub> -C <sub>70</sub> | 130.61 |
| N <sub>23</sub> -Zn <sub>41</sub> | 1.989 | C <sub>26</sub> -O <sub>65</sub> -C <sub>74</sub> | 119.76  | N <sub>23</sub> -Si <sub>41</sub> | 1.937 | Si <sub>41</sub> -O <sub>58</sub> -C <sub>60</sub> | 130.96 |
| N <sub>14</sub> -Zn <sub>41</sub> | 1.991 | C <sub>17</sub> -O <sub>64</sub> -C <sub>66</sub> | 120.45  | N <sub>14</sub> -Si <sub>41</sub> | 1.934 |                                                    |        |
| N <sub>32</sub> -Zn <sub>41</sub> | 1.991 | C <sub>35</sub> -O <sub>53</sub> -C <sub>54</sub> | 120.25  | N <sub>32</sub> -Si <sub>41</sub> | 1.930 |                                                    |        |
| <b>ZnPc 2A</b>                    |       |                                                   |         | <b>SiPc 2A</b>                    |       |                                                    |        |
| N <sub>5</sub> -Zn <sub>41</sub>  | 1.989 | C <sub>8</sub> -O <sub>86</sub> -C <sub>87</sub>  | 118.872 | N <sub>5</sub> -Si <sub>41</sub>  | 1.930 | Si <sub>41</sub> -O <sub>59</sub> -C <sub>70</sub> | 129.52 |
| N <sub>23</sub> -Zn <sub>41</sub> | 1.987 | C <sub>26</sub> -O <sub>65</sub> -C <sub>72</sub> | 118.917 | N <sub>23</sub> -Si <sub>41</sub> | 1.931 | Si <sub>41</sub> -O <sub>58</sub> -C <sub>60</sub> | 131.44 |
| N <sub>14</sub> -Zn <sub>41</sub> | 1.991 | C <sub>17</sub> -O <sub>64</sub> -C <sub>66</sub> | 118.882 | N <sub>14</sub> -Si <sub>41</sub> | 1.934 |                                                    |        |
| N <sub>32</sub> -Zn <sub>41</sub> | 1.990 | C <sub>35</sub> -O <sub>53</sub> -C <sub>54</sub> | 119.825 | N <sub>32</sub> -Si <sub>41</sub> | 1.930 |                                                    |        |
| <b>ZnPc 3A</b>                    |       |                                                   |         | <b>SiPc 3A</b>                    |       |                                                    |        |
| N <sub>5</sub> -Zn <sub>41</sub>  | 1.992 | C <sub>8</sub> -O <sub>86</sub> -C <sub>87</sub>  | 119.476 | N <sub>5</sub> -Si <sub>41</sub>  | 1.929 | Si <sub>41</sub> -O <sub>59</sub> -C <sub>70</sub> | 129.94 |
| N <sub>23</sub> -Zn <sub>41</sub> | 1.989 | C <sub>26</sub> -O <sub>65</sub> -C <sub>72</sub> | 119.532 | N <sub>23</sub> -Si <sub>41</sub> | 1.929 | Si <sub>41</sub> -O <sub>58</sub> -C <sub>60</sub> | 131.26 |
| N <sub>14</sub> -Zn <sub>41</sub> | 1.991 | C <sub>17</sub> -O <sub>64</sub> -C <sub>66</sub> | 119.541 | N <sub>14</sub> -Si <sub>41</sub> | 1.932 |                                                    |        |
| N <sub>32</sub> -Zn <sub>41</sub> | 1.992 | C <sub>35</sub> -O <sub>53</sub> -C <sub>54</sub> | 120.961 | N <sub>32</sub> -Si <sub>41</sub> | 1.929 |                                                    |        |
| <b>ZnPc 4A</b>                    |       |                                                   |         | <b>SiPc 4A</b>                    |       |                                                    |        |
| N <sub>5</sub> -Zn <sub>41</sub>  | 1.991 | C <sub>8</sub> -O <sub>86</sub> -C <sub>87</sub>  | 120.356 | N <sub>5</sub> -Si <sub>41</sub>  | 1.931 | Si <sub>41</sub> -O <sub>59</sub> -C <sub>70</sub> | 129.35 |
| N <sub>23</sub> -Zn <sub>41</sub> | 1.988 | C <sub>26</sub> -O <sub>65</sub> -C <sub>72</sub> | 120.603 | N <sub>23</sub> -Si <sub>41</sub> | 1.938 | Si <sub>41</sub> -O <sub>58</sub> -C <sub>60</sub> | 131.09 |
| N <sub>14</sub> -Zn <sub>41</sub> | 1.990 | C <sub>17</sub> -O <sub>64</sub> -C <sub>66</sub> | 120.433 | N <sub>14</sub> -Si <sub>41</sub> | 1.935 |                                                    |        |
| N <sub>32</sub> -Zn <sub>41</sub> | 1.992 | C <sub>35</sub> -O <sub>53</sub> -C <sub>54</sub> | 119.944 | N <sub>32</sub> -Si <sub>41</sub> | 1.931 |                                                    |        |
| <b>ZnPc 5A</b>                    |       |                                                   |         | <b>SiPc 5A</b>                    |       |                                                    |        |
| N <sub>5</sub> -Zn <sub>41</sub>  | 1.990 | C <sub>8</sub> -O <sub>86</sub> -C <sub>87</sub>  | 118.646 | N <sub>5</sub> -Si <sub>41</sub>  | 1.932 | Si <sub>41</sub> -O <sub>59</sub> -C <sub>70</sub> | 126.42 |
| N <sub>23</sub> -Zn <sub>41</sub> | 1.988 | C <sub>26</sub> -O <sub>65</sub> -C <sub>72</sub> | 118.639 | N <sub>23</sub> -Si <sub>41</sub> | 1.932 | Si <sub>41</sub> -O <sub>58</sub> -C <sub>60</sub> | 131.74 |
| N <sub>14</sub> -Zn <sub>41</sub> | 1.989 | C <sub>17</sub> -O <sub>64</sub> -C <sub>66</sub> | 118.620 | N <sub>14</sub> -Si <sub>41</sub> | 1.930 |                                                    |        |
| N <sub>32</sub> -Zn <sub>41</sub> | 1.993 | C <sub>35</sub> -O <sub>53</sub> -C <sub>54</sub> | 119.599 | N <sub>32</sub> -Si <sub>41</sub> | 1.925 |                                                    |        |
| <b>ZnPc 6A</b>                    |       |                                                   |         | <b>SiPc 6A</b>                    |       |                                                    |        |
| N <sub>5</sub> -Zn <sub>41</sub>  | 1.991 | C <sub>8</sub> -O <sub>86</sub> -C <sub>87</sub>  | 119.087 | N <sub>5</sub> -Si <sub>41</sub>  | 1.932 | Si <sub>41</sub> -O <sub>59</sub> -C <sub>70</sub> | 125.13 |
| N <sub>23</sub> -Zn <sub>41</sub> | 1.988 | C <sub>26</sub> -O <sub>65</sub> -C <sub>72</sub> | 119.205 | N <sub>23</sub> -Si <sub>41</sub> | 1.931 | Si <sub>41</sub> -O <sub>58</sub> -C <sub>60</sub> | 131.65 |
| N <sub>14</sub> -Zn <sub>41</sub> | 1.991 | C <sub>17</sub> -O <sub>64</sub> -C <sub>66</sub> | 119.219 | N <sub>14</sub> -Si <sub>41</sub> | 1.931 |                                                    |        |
| N <sub>32</sub> -Zn <sub>41</sub> | 1.993 | C <sub>35</sub> -O <sub>53</sub> -C <sub>54</sub> | 120.970 | N <sub>32</sub> -Si <sub>41</sub> | 1.927 |                                                    |        |
| <b>ZnPc 7A</b>                    |       |                                                   |         | <b>SiPc 7A</b>                    |       |                                                    |        |
| N <sub>5</sub> -Zn <sub>41</sub>  | 1.991 | C <sub>8</sub> -O <sub>86</sub> -C <sub>87</sub>  | 120.274 | N <sub>5</sub> -Si <sub>41</sub>  | 1.933 | Si <sub>41</sub> -O <sub>59</sub> -C <sub>70</sub> | 130.45 |
| N <sub>23</sub> -Zn <sub>41</sub> | 1.988 | C <sub>26</sub> -O <sub>65</sub> -C <sub>72</sub> | 119.993 | N <sub>23</sub> -Si <sub>41</sub> | 1.937 | Si <sub>41</sub> -O <sub>58</sub> -C <sub>60</sub> | 131.03 |
| N <sub>14</sub> -Zn <sub>41</sub> | 1.990 | C <sub>17</sub> -O <sub>64</sub> -C <sub>66</sub> | 120.281 | N <sub>14</sub> -Si <sub>41</sub> | 1.935 |                                                    |        |
| N <sub>32</sub> -Zn <sub>41</sub> | 1.992 | C <sub>35</sub> -O <sub>53</sub> -C <sub>54</sub> | 120.044 | N <sub>32</sub> -Si <sub>41</sub> | 1.931 |                                                    |        |

|                                   |       |                                                   |         |                                   |       |                                                    |        |
|-----------------------------------|-------|---------------------------------------------------|---------|-----------------------------------|-------|----------------------------------------------------|--------|
| <b>ZnPc 8A</b>                    |       |                                                   |         | <b>SiPc 8A</b>                    |       |                                                    |        |
| N <sub>5</sub> -Zn <sub>41</sub>  | 1.990 | C <sub>8</sub> -O <sub>86</sub> -C <sub>87</sub>  | 118.452 | N <sub>5</sub> -Si <sub>41</sub>  | 1.930 | Si <sub>41</sub> -O <sub>59</sub> -C <sub>70</sub> | 125.70 |
| N <sub>23</sub> -Zn <sub>41</sub> | 1.987 | C <sub>26</sub> -O <sub>65</sub> -C <sub>72</sub> | 118.631 | N <sub>23</sub> -Si <sub>41</sub> | 1.935 | Si <sub>41</sub> -O <sub>58</sub> -C <sub>60</sub> | 131.53 |
| N <sub>14</sub> -Zn <sub>41</sub> | 1.989 | C <sub>17</sub> -O <sub>64</sub> -C <sub>66</sub> | 118.440 | N <sub>14</sub> -Si <sub>41</sub> | 1.932 |                                                    |        |
| N <sub>32</sub> -Zn <sub>41</sub> | 1.993 | C <sub>35</sub> -O <sub>53</sub> -C <sub>54</sub> | 119.572 | N <sub>32</sub> -Si <sub>41</sub> | 1.923 |                                                    |        |
| <b>ZnPc 9A</b>                    |       |                                                   |         | <b>SiPc 9A</b>                    |       |                                                    |        |
| N <sub>5</sub> -Zn <sub>41</sub>  | 1.990 | C <sub>8</sub> -O <sub>86</sub> -C <sub>87</sub>  | 118.984 | N <sub>5</sub> -Si <sub>41</sub>  | 1.930 | Si <sub>41</sub> -O <sub>59</sub> -C <sub>70</sub> | 124.76 |
| N <sub>23</sub> -Zn <sub>41</sub> | 1.989 | C <sub>26</sub> -O <sub>65</sub> -C <sub>72</sub> | 118.733 | N <sub>23</sub> -Si <sub>41</sub> | 1.927 | Si <sub>41</sub> -O <sub>58</sub> -C <sub>60</sub> | 131.54 |
| N <sub>14</sub> -Zn <sub>41</sub> | 1.990 | C <sub>17</sub> -O <sub>64</sub> -C <sub>66</sub> | 118.854 | N <sub>14</sub> -Si <sub>41</sub> | 1.929 |                                                    |        |
| N <sub>32</sub> -Zn <sub>41</sub> | 1.992 | C <sub>35</sub> -O <sub>53</sub> -C <sub>54</sub> | 120.910 | N <sub>32</sub> -Si <sub>41</sub> | 1.926 |                                                    |        |
| <b>ZnPc 10A</b>                   |       |                                                   |         | <b>SiPc 10A</b>                   |       |                                                    |        |
| N <sub>5</sub> -Zn <sub>41</sub>  | 1.990 | C <sub>8</sub> -O <sub>86</sub> -C <sub>87</sub>  | 121.063 | N <sub>5</sub> -Si <sub>41</sub>  | 1.922 | Si <sub>41</sub> -O <sub>59</sub> -C <sub>70</sub> | 123.51 |
| N <sub>23</sub> -Zn <sub>41</sub> | 1.989 | C <sub>26</sub> -O <sub>65</sub> -C <sub>72</sub> | 120.854 | N <sub>23</sub> -Si <sub>41</sub> | 1.920 | Si <sub>41</sub> -O <sub>58</sub> -C <sub>60</sub> | 124.00 |
| N <sub>14</sub> -Zn <sub>41</sub> | 1.990 | C <sub>17</sub> -O <sub>64</sub> -C <sub>66</sub> | 120.944 | N <sub>14</sub> -Si <sub>41</sub> | 1.926 |                                                    |        |
| N <sub>32</sub> -Zn <sub>41</sub> | 1.991 | C <sub>35</sub> -O <sub>53</sub> -C <sub>54</sub> | 120.422 | N <sub>32</sub> -Si <sub>41</sub> | 1.920 |                                                    |        |
| <b>ZnPc 11A</b>                   |       |                                                   |         | <b>SiPc 11A</b>                   |       |                                                    |        |
| N <sub>5</sub> -Zn <sub>41</sub>  | 1.990 | C <sub>8</sub> -O <sub>86</sub> -C <sub>87</sub>  | 121.461 | N <sub>5</sub> -Si <sub>41</sub>  | 1.922 | Si <sub>41</sub> -O <sub>59</sub> -C <sub>70</sub> | 125.90 |
| N <sub>23</sub> -Zn <sub>41</sub> | 1.989 | C <sub>26</sub> -O <sub>65</sub> -C <sub>72</sub> | 121.227 | N <sub>23</sub> -Si <sub>41</sub> | 1.924 | Si <sub>41</sub> -O <sub>58</sub> -C <sub>60</sub> | 124.05 |
| N <sub>14</sub> -Zn <sub>41</sub> | 1.990 | C <sub>17</sub> -O <sub>64</sub> -C <sub>66</sub> | 121.402 | N <sub>14</sub> -Si <sub>41</sub> | 1.924 |                                                    |        |
| N <sub>32</sub> -Zn <sub>41</sub> | 1.991 | C <sub>35</sub> -O <sub>53</sub> -C <sub>54</sub> | 120.600 | N <sub>32</sub> -Si <sub>41</sub> | 1.916 |                                                    |        |
| <b>ZnPc 1B</b>                    |       |                                                   |         | <b>SiPc 1B</b>                    |       |                                                    |        |
| N <sub>5</sub> -Zn <sub>41</sub>  | 1.991 | C <sub>8</sub> -O <sub>86</sub> -C <sub>87</sub>  | 120.452 | N <sub>5</sub> -Si <sub>41</sub>  | 1.932 | Si <sub>41</sub> -O <sub>59</sub> -C <sub>70</sub> | 130.81 |
| N <sub>23</sub> -Zn <sub>41</sub> | 1.989 | C <sub>26</sub> -O <sub>65</sub> -C <sub>72</sub> | 119.829 | N <sub>23</sub> -Si <sub>41</sub> | 1.936 | Si <sub>41</sub> -O <sub>58</sub> -C <sub>60</sub> | 131.08 |
| N <sub>14</sub> -Zn <sub>41</sub> | 1.991 | C <sub>17</sub> -O <sub>64</sub> -C <sub>66</sub> | 120.505 | N <sub>14</sub> -Si <sub>41</sub> | 1.933 |                                                    |        |
| N <sub>32</sub> -Zn <sub>41</sub> | 1.991 | C <sub>35</sub> -O <sub>53</sub> -C <sub>54</sub> | 120.029 | N <sub>32</sub> -Si <sub>41</sub> | 1.931 |                                                    |        |
| <b>ZnPc 2B</b>                    |       |                                                   |         | <b>SiPc 2B</b>                    |       |                                                    |        |
| N <sub>5</sub> -Zn <sub>41</sub>  | 1.989 | C <sub>8</sub> -O <sub>86</sub> -C <sub>87</sub>  | 118.834 | N <sub>5</sub> -Si <sub>41</sub>  | 1.930 | Si <sub>41</sub> -O <sub>59</sub> -C <sub>70</sub> | 129.47 |
| N <sub>23</sub> -Zn <sub>41</sub> | 1.987 | C <sub>26</sub> -O <sub>65</sub> -C <sub>72</sub> | 118.824 | N <sub>23</sub> -Si <sub>41</sub> | 1.931 | Si <sub>41</sub> -O <sub>58</sub> -C <sub>60</sub> | 131.33 |
| N <sub>14</sub> -Zn <sub>41</sub> | 1.989 | C <sub>17</sub> -O <sub>64</sub> -C <sub>66</sub> | 118.829 | N <sub>14</sub> -Si <sub>41</sub> | 1.933 |                                                    |        |
| N <sub>32</sub> -Zn <sub>41</sub> | 1.992 | C <sub>35</sub> -O <sub>53</sub> -C <sub>54</sub> | 120.161 | N <sub>32</sub> -Si <sub>41</sub> | 1.932 |                                                    |        |
| <b>ZnPc 3B</b>                    |       |                                                   |         | <b>SiPc 3B</b>                    |       |                                                    |        |
| N <sub>5</sub> -Zn <sub>41</sub>  | 1.992 | C <sub>8</sub> -O <sub>86</sub> -C <sub>87</sub>  | 119.120 | N <sub>5</sub> -Si <sub>41</sub>  | 1.929 | Si <sub>41</sub> -O <sub>59</sub> -C <sub>70</sub> | 129.96 |
| N <sub>23</sub> -Zn <sub>41</sub> | 1.989 | C <sub>26</sub> -O <sub>65</sub> -C <sub>72</sub> | 119.133 | N <sub>23</sub> -Si <sub>41</sub> | 1.930 | Si <sub>41</sub> -O <sub>58</sub> -C <sub>60</sub> | 131.36 |
| N <sub>14</sub> -Zn <sub>41</sub> | 1.991 | C <sub>17</sub> -O <sub>64</sub> -C <sub>66</sub> | 119.151 | N <sub>14</sub> -Si <sub>41</sub> | 1.932 |                                                    |        |
| N <sub>32</sub> -Zn <sub>41</sub> | 1.992 | C <sub>35</sub> -O <sub>53</sub> -C <sub>54</sub> | 120.680 | N <sub>32</sub> -Si <sub>41</sub> | 1.930 |                                                    |        |
| <b>ZnPc 4B</b>                    |       |                                                   |         | <b>SiPc 4B</b>                    |       |                                                    |        |
| N <sub>5</sub> -Zn <sub>41</sub>  | 1.991 | C <sub>8</sub> -O <sub>86</sub> -C <sub>87</sub>  | 120.393 | N <sub>5</sub> -Si <sub>41</sub>  | 1.937 | Si <sub>41</sub> -O <sub>59</sub> -C <sub>70</sub> | 129.44 |
| N <sub>23</sub> -Zn <sub>41</sub> | 1.988 | C <sub>26</sub> -O <sub>65</sub> -C <sub>72</sub> | 120.653 | N <sub>23</sub> -Si <sub>41</sub> | 1.933 | Si <sub>41</sub> -O <sub>58</sub> -C <sub>60</sub> | 131.19 |
| N <sub>14</sub> -Zn <sub>41</sub> | 1.991 | C <sub>17</sub> -O <sub>64</sub> -C <sub>66</sub> | 120.471 | N <sub>14</sub> -Si <sub>41</sub> | 1.933 |                                                    |        |
| N <sub>32</sub> -Zn <sub>41</sub> | 1.992 | C <sub>35</sub> -O <sub>53</sub> -C <sub>54</sub> | 119.877 | N <sub>32</sub> -Si <sub>41</sub> | 1.934 |                                                    |        |
| <b>ZnPc 5B</b>                    |       |                                                   |         | <b>SiPc 5B</b>                    |       |                                                    |        |
| N <sub>5</sub> -Zn <sub>41</sub>  | 1.990 | C <sub>8</sub> -O <sub>86</sub> -C <sub>87</sub>  | 118.572 | N <sub>5</sub> -Si <sub>41</sub>  | 1.932 | Si <sub>41</sub> -O <sub>59</sub> -C <sub>70</sub> | 126.36 |
| N <sub>23</sub> -Zn <sub>41</sub> | 1.988 | C <sub>26</sub> -O <sub>65</sub> -C <sub>72</sub> | 118.625 | N <sub>23</sub> -Si <sub>41</sub> | 1.932 | Si <sub>41</sub> -O <sub>58</sub> -C <sub>60</sub> | 131.71 |
| N <sub>14</sub> -Zn <sub>41</sub> | 1.989 | C <sub>17</sub> -O <sub>64</sub> -C <sub>66</sub> | 118.532 | N <sub>14</sub> -Si <sub>41</sub> | 1.929 |                                                    |        |
| N <sub>32</sub> -Zn <sub>41</sub> | 1.992 | C <sub>35</sub> -O <sub>53</sub> -C <sub>54</sub> | 120.117 | N <sub>32</sub> -Si <sub>41</sub> | 1.928 |                                                    |        |
| <b>ZnPc 6B</b>                    |       |                                                   |         | <b>SiPc 6B</b>                    |       |                                                    |        |
| N <sub>5</sub> -Zn <sub>41</sub>  | 1.990 | C <sub>8</sub> -O <sub>86</sub> -C <sub>87</sub>  | 119.099 | N <sub>5</sub> -Si <sub>41</sub>  | 1.932 | Si <sub>41</sub> -O <sub>59</sub> -C <sub>70</sub> | 125.02 |
| N <sub>23</sub> -Zn <sub>41</sub> | 1.988 | C <sub>26</sub> -O <sub>65</sub> -C <sub>72</sub> | 119.092 | N <sub>23</sub> -Si <sub>41</sub> | 1.931 | Si <sub>41</sub> -O <sub>58</sub> -C <sub>60</sub> | 131.74 |
| N <sub>14</sub> -Zn <sub>41</sub> | 1.991 | C <sub>17</sub> -O <sub>64</sub> -C <sub>66</sub> | 119.157 | N <sub>14</sub> -Si <sub>41</sub> | 1.932 |                                                    |        |



|                                   |       |                                                   |         |                                   |       |                                                    |        |
|-----------------------------------|-------|---------------------------------------------------|---------|-----------------------------------|-------|----------------------------------------------------|--------|
| N <sub>32</sub> -Zn <sub>41</sub> | 1.992 | C <sub>35</sub> -O <sub>53</sub> -C <sub>54</sub> | 119.947 | N <sub>32</sub> -Si <sub>41</sub> | 1.929 |                                                    |        |
|                                   |       | <b>ZnPc 7B</b>                                    |         |                                   |       | <b>SiPc 7B</b>                                     |        |
| N <sub>5</sub> -Zn <sub>41</sub>  | 1.990 | C <sub>8</sub> -O <sub>86</sub> -C <sub>87</sub>  | 119.964 | N <sub>5</sub> -Si <sub>41</sub>  | 1.934 | Si <sub>41</sub> -O <sub>59</sub> -C <sub>70</sub> | 130.42 |
| N <sub>23</sub> -Zn <sub>41</sub> | 1.988 | C <sub>26</sub> -O <sub>65</sub> -C <sub>72</sub> | 120.057 | N <sub>23</sub> -Si <sub>41</sub> | 1.937 | Si <sub>41</sub> -O <sub>58</sub> -C <sub>60</sub> | 131.27 |
| N <sub>14</sub> -Zn <sub>41</sub> | 1.990 | C <sub>17</sub> -O <sub>64</sub> -C <sub>66</sub> | 120.037 | N <sub>14</sub> -Si <sub>41</sub> | 1.933 |                                                    |        |
| N <sub>32</sub> -Zn <sub>41</sub> | 1.992 | C <sub>35</sub> -O <sub>53</sub> -C <sub>54</sub> | 119.680 | N <sub>32</sub> -Si <sub>41</sub> | 1.935 |                                                    |        |
|                                   |       | <b>ZnPc 8B</b>                                    |         |                                   |       | <b>SiPc 8B</b>                                     |        |
| N <sub>5</sub> -Zn <sub>41</sub>  | 1.989 | C <sub>8</sub> -O <sub>86</sub> -C <sub>87</sub>  | 118.002 | N <sub>5</sub> -Si <sub>41</sub>  | 1.932 | Si <sub>41</sub> -O <sub>59</sub> -C <sub>70</sub> | 126.30 |
| N <sub>23</sub> -Zn <sub>41</sub> | 1.987 | C <sub>26</sub> -O <sub>65</sub> -C <sub>72</sub> | 117.964 | N <sub>23</sub> -Si <sub>41</sub> | 1.931 | Si <sub>41</sub> -O <sub>58</sub> -C <sub>60</sub> | 131.73 |
| N <sub>14</sub> -Zn <sub>41</sub> | 1.989 | C <sub>17</sub> -O <sub>64</sub> -C <sub>66</sub> | 117.986 | N <sub>14</sub> -Si <sub>41</sub> | 1.929 |                                                    |        |
| N <sub>32</sub> -Zn <sub>41</sub> | 1.992 | C <sub>35</sub> -O <sub>53</sub> -C <sub>54</sub> | 119.681 | N <sub>32</sub> -Si <sub>41</sub> | 1.927 |                                                    |        |
|                                   |       | <b>ZnPc 9B</b>                                    |         |                                   |       | <b>SiPc 9B</b>                                     |        |
| N <sub>5</sub> -Zn <sub>41</sub>  | 1.990 | C <sub>8</sub> -O <sub>86</sub> -C <sub>87</sub>  | 119.098 | N <sub>5</sub> -Si <sub>41</sub>  | 1.928 | Si <sub>41</sub> -O <sub>59</sub> -C <sub>70</sub> | 125.17 |
| N <sub>23</sub> -Zn <sub>41</sub> | 1.989 | C <sub>26</sub> -O <sub>65</sub> -C <sub>72</sub> | 118.811 | N <sub>23</sub> -Si <sub>41</sub> | 1.930 | Si <sub>41</sub> -O <sub>58</sub> -C <sub>60</sub> | 131.77 |
| N <sub>14</sub> -Zn <sub>41</sub> | 1.991 | C <sub>17</sub> -O <sub>64</sub> -C <sub>66</sub> | 118.792 | N <sub>14</sub> -Si <sub>41</sub> | 1.927 |                                                    |        |
| N <sub>32</sub> -Zn <sub>41</sub> | 1.992 | C <sub>35</sub> -O <sub>53</sub> -C <sub>54</sub> | 119.376 | N <sub>32</sub> -Si <sub>41</sub> | 1.929 |                                                    |        |
|                                   |       | <b>ZnPc 10B</b>                                   |         |                                   |       | <b>SiPc 10B</b>                                    |        |
| N <sub>5</sub> -Zn <sub>41</sub>  | 1.990 | C <sub>8</sub> -O <sub>86</sub> -C <sub>87</sub>  | 120.384 | N <sub>5</sub> -Si <sub>41</sub>  | 1.925 | Si <sub>41</sub> -O <sub>59</sub> -C <sub>70</sub> | 128.53 |
| N <sub>23</sub> -Zn <sub>41</sub> | 1.990 | C <sub>26</sub> -O <sub>65</sub> -C <sub>72</sub> | 120.206 | N <sub>23</sub> -Si <sub>41</sub> | 1.939 | Si <sub>41</sub> -O <sub>58</sub> -C <sub>60</sub> | 130.94 |
| N <sub>14</sub> -Zn <sub>41</sub> | 1.991 | C <sub>17</sub> -O <sub>64</sub> -C <sub>66</sub> | 120.621 | N <sub>14</sub> -Si <sub>41</sub> | 1.935 |                                                    |        |
| N <sub>32</sub> -Zn <sub>41</sub> | 1.992 | C <sub>35</sub> -O <sub>53</sub> -C <sub>54</sub> | 120.177 | N <sub>32</sub> -Si <sub>41</sub> | 1.935 |                                                    |        |
|                                   |       | <b>ZnPc 11B</b>                                   |         |                                   |       | <b>SiPc 11B</b>                                    |        |
| N <sub>5</sub> -Zn <sub>41</sub>  | 1.990 | C <sub>8</sub> -O <sub>86</sub> -C <sub>87</sub>  | 121.041 | N <sub>5</sub> -Si <sub>41</sub>  | 1.933 | Si <sub>41</sub> -O <sub>59</sub> -C <sub>70</sub> | 130.96 |
| N <sub>23</sub> -Zn <sub>41</sub> | 1.989 | C <sub>26</sub> -O <sub>65</sub> -C <sub>72</sub> | 121.227 | N <sub>23</sub> -Si <sub>41</sub> | 1.932 | Si <sub>41</sub> -O <sub>58</sub> -C <sub>60</sub> | 130.98 |
| N <sub>14</sub> -Zn <sub>41</sub> | 1.990 | C <sub>17</sub> -O <sub>64</sub> -C <sub>66</sub> | 121.041 | N <sub>14</sub> -Si <sub>41</sub> | 1.934 |                                                    |        |
| N <sub>32</sub> -Zn <sub>41</sub> | 1.990 | C <sub>35</sub> -O <sub>53</sub> -C <sub>54</sub> | 120.244 | N <sub>32</sub> -Si <sub>41</sub> | 1.931 |                                                    |        |
|                                   |       | <b>ZnPc 1C</b>                                    |         |                                   |       | <b>SiPc 1C</b>                                     |        |
| N <sub>5</sub> -Zn <sub>41</sub>  | 1.991 | C <sub>8</sub> -O <sub>86</sub> -C <sub>87</sub>  | 120.398 | N <sub>5</sub> -Si <sub>41</sub>  | 1.934 | Si <sub>41</sub> -O <sub>59</sub> -C <sub>69</sub> | 131.10 |
| N <sub>23</sub> -Zn <sub>41</sub> | 1.991 | C <sub>26</sub> -O <sub>65</sub> -C <sub>72</sub> | 119.991 | N <sub>23</sub> -Si <sub>41</sub> | 1.936 | Si <sub>41</sub> -O <sub>58</sub> -C <sub>60</sub> | 130.42 |
| N <sub>14</sub> -Zn <sub>41</sub> | 1.991 | C <sub>17</sub> -O <sub>64</sub> -C <sub>66</sub> | 120.364 | N <sub>14</sub> -Si <sub>41</sub> | 1.934 |                                                    |        |
| N <sub>32</sub> -Zn <sub>41</sub> | 1.990 | C <sub>35</sub> -O <sub>53</sub> -C <sub>54</sub> | 120.231 | N <sub>32</sub> -Si <sub>41</sub> | 1.935 |                                                    |        |
|                                   |       | <b>ZnPc 2C</b>                                    |         |                                   |       | <b>SiPc 2C</b>                                     |        |
| N <sub>5</sub> -Zn <sub>41</sub>  | 1.990 | C <sub>8</sub> -O <sub>86</sub> -C <sub>87</sub>  | 120.384 | N <sub>5</sub> -Si <sub>41</sub>  | 1.932 | Si <sub>41</sub> -O <sub>59</sub> -C <sub>69</sub> | 129.76 |
| N <sub>23</sub> -Zn <sub>41</sub> | 1.990 | C <sub>26</sub> -O <sub>65</sub> -C <sub>72</sub> | 120.206 | N <sub>23</sub> -Si <sub>41</sub> | 1.932 | Si <sub>41</sub> -O <sub>58</sub> -C <sub>60</sub> | 130.61 |
| N <sub>14</sub> -Zn <sub>41</sub> | 1.991 | C <sub>17</sub> -O <sub>64</sub> -C <sub>66</sub> | 120.621 | N <sub>14</sub> -Si <sub>41</sub> | 1.934 |                                                    |        |
| N <sub>32</sub> -Zn <sub>41</sub> | 1.992 | C <sub>35</sub> -O <sub>53</sub> -C <sub>54</sub> | 120.177 | N <sub>32</sub> -Si <sub>41</sub> | 1.936 |                                                    |        |
|                                   |       | <b>ZnPc 3C</b>                                    |         |                                   |       | <b>SiPc 3C</b>                                     |        |
| N <sub>5</sub> -Zn <sub>41</sub>  | 1.990 | C <sub>8</sub> -O <sub>86</sub> -C <sub>87</sub>  | 120.384 | N <sub>5</sub> -Si <sub>41</sub>  | 1.930 | Si <sub>41</sub> -O <sub>59</sub> -C <sub>69</sub> | 130.14 |
| N <sub>23</sub> -Zn <sub>41</sub> | 1.990 | C <sub>26</sub> -O <sub>65</sub> -C <sub>72</sub> | 120.206 | N <sub>23</sub> -Si <sub>41</sub> | 1.931 | Si <sub>41</sub> -O <sub>58</sub> -C <sub>60</sub> | 130.67 |
| N <sub>14</sub> -Zn <sub>41</sub> | 1.991 | C <sub>17</sub> -O <sub>64</sub> -C <sub>66</sub> | 120.621 | N <sub>14</sub> -Si <sub>41</sub> | 1.932 |                                                    |        |
| N <sub>32</sub> -Zn <sub>41</sub> | 1.992 | C <sub>35</sub> -O <sub>53</sub> -C <sub>54</sub> | 120.177 | N <sub>32</sub> -Si <sub>41</sub> | 1.934 |                                                    |        |
|                                   |       | <b>ZnPc 4C</b>                                    |         |                                   |       | <b>SiPc 4C</b>                                     |        |
| N <sub>5</sub> -Zn <sub>41</sub>  | 1.990 | C <sub>8</sub> -O <sub>86</sub> -C <sub>87</sub>  | 120.384 | N <sub>5</sub> -Si <sub>41</sub>  | 1.937 | Si <sub>41</sub> -O <sub>59</sub> -C <sub>69</sub> | 129.51 |
| N <sub>23</sub> -Zn <sub>41</sub> | 1.990 | C <sub>26</sub> -O <sub>65</sub> -C <sub>72</sub> | 120.206 | N <sub>23</sub> -Si <sub>41</sub> | 1.936 | Si <sub>41</sub> -O <sub>58</sub> -C <sub>60</sub> | 130.54 |
| N <sub>14</sub> -Zn <sub>41</sub> | 1.991 | C <sub>17</sub> -O <sub>64</sub> -C <sub>66</sub> | 120.621 | N <sub>14</sub> -Si <sub>41</sub> | 1.936 |                                                    |        |
| N <sub>32</sub> -Zn <sub>41</sub> | 1.992 | C <sub>35</sub> -O <sub>53</sub> -C <sub>54</sub> | 120.177 | N <sub>32</sub> -Si <sub>41</sub> | 1.937 |                                                    |        |
|                                   |       | <b>ZnPc 5C</b>                                    |         |                                   |       | <b>SiPc 5C</b>                                     |        |
| N <sub>5</sub> -Zn <sub>41</sub>  | 1.990 | C <sub>8</sub> -O <sub>86</sub> -C <sub>87</sub>  | 120.384 | N <sub>5</sub> -Si <sub>41</sub>  | 1.933 | Si <sub>41</sub> -O <sub>59</sub> -C <sub>69</sub> | 126.76 |
| N <sub>23</sub> -Zn <sub>41</sub> | 1.990 | C <sub>26</sub> -O <sub>65</sub> -C <sub>72</sub> | 120.206 | N <sub>23</sub> -Si <sub>41</sub> | 1.934 | Si <sub>41</sub> -O <sub>58</sub> -C <sub>60</sub> | 130.95 |

|                                   |       |                                                   |         |                                   |       |                                                    |        |
|-----------------------------------|-------|---------------------------------------------------|---------|-----------------------------------|-------|----------------------------------------------------|--------|
| N <sub>14</sub> -Zn <sub>41</sub> | 1.991 | C <sub>17</sub> -O <sub>64</sub> -C <sub>66</sub> | 120.621 | N <sub>14</sub> -Si <sub>41</sub> | 1.929 |                                                    |        |
| N <sub>32</sub> -Zn <sub>41</sub> | 1.992 | C <sub>35</sub> -O <sub>53</sub> -C <sub>54</sub> | 120.177 | N <sub>32</sub> -Si <sub>41</sub> | 1.932 |                                                    |        |
| <b>ZnPc 6C</b>                    |       |                                                   |         | <b>SiPc 6C</b>                    |       |                                                    |        |
| N <sub>5</sub> -Zn <sub>41</sub>  | 1.990 | C <sub>8</sub> -O <sub>86</sub> -C <sub>87</sub>  | 120.384 | N <sub>5</sub> -Si <sub>41</sub>  | 1.932 | Si <sub>41</sub> -O <sub>59</sub> -C <sub>69</sub> | 125.28 |
| N <sub>23</sub> -Zn <sub>41</sub> | 1.990 | C <sub>26</sub> -O <sub>65</sub> -C <sub>72</sub> | 120.206 | N <sub>23</sub> -Si <sub>41</sub> | 1.934 | Si <sub>41</sub> -O <sub>58</sub> -C <sub>60</sub> | 131.05 |
| N <sub>14</sub> -Zn <sub>41</sub> | 1.991 | C <sub>17</sub> -O <sub>64</sub> -C <sub>66</sub> | 120.621 | N <sub>14</sub> -Si <sub>41</sub> | 1.931 |                                                    |        |
| N <sub>32</sub> -Zn <sub>41</sub> | 1.992 | C <sub>35</sub> -O <sub>53</sub> -C <sub>54</sub> | 120.177 | N <sub>32</sub> -Si <sub>41</sub> | 1.933 |                                                    |        |
| <b>ZnPc 7C</b>                    |       |                                                   |         | <b>SiPc 7C</b>                    |       |                                                    |        |
| N <sub>5</sub> -Zn <sub>41</sub>  | 1.990 | C <sub>8</sub> -O <sub>86</sub> -C <sub>87</sub>  | 120.384 | N <sub>5</sub> -Si <sub>41</sub>  | 1.932 | Si <sub>41</sub> -O <sub>59</sub> -C <sub>69</sub> | 125.28 |
| N <sub>23</sub> -Zn <sub>41</sub> | 1.990 | C <sub>26</sub> -O <sub>65</sub> -C <sub>72</sub> | 120.206 | N <sub>23</sub> -Si <sub>41</sub> | 1.934 | Si <sub>41</sub> -O <sub>58</sub> -C <sub>60</sub> | 131.05 |
| N <sub>14</sub> -Zn <sub>41</sub> | 1.991 | C <sub>17</sub> -O <sub>64</sub> -C <sub>66</sub> | 120.621 | N <sub>14</sub> -Si <sub>41</sub> | 1.931 |                                                    |        |
| N <sub>32</sub> -Zn <sub>41</sub> | 1.992 | C <sub>35</sub> -O <sub>53</sub> -C <sub>54</sub> | 120.177 | N <sub>32</sub> -Si <sub>41</sub> | 1.933 |                                                    |        |
| <b>ZnPc 8C</b>                    |       |                                                   |         | <b>SiPc 8C</b>                    |       |                                                    |        |
| N <sub>5</sub> -Zn <sub>41</sub>  | 1.990 | C <sub>8</sub> -O <sub>86</sub> -C <sub>87</sub>  | 120.384 | N <sub>5</sub> -Si <sub>41</sub>  | 1.931 | Si <sub>41</sub> -O <sub>59</sub> -C <sub>69</sub> | 126.45 |
| N <sub>23</sub> -Zn <sub>41</sub> | 1.990 | C <sub>26</sub> -O <sub>65</sub> -C <sub>72</sub> | 120.206 | N <sub>23</sub> -Si <sub>41</sub> | 1.933 | Si <sub>41</sub> -O <sub>58</sub> -C <sub>60</sub> | 130.97 |
| N <sub>14</sub> -Zn <sub>41</sub> | 1.991 | C <sub>17</sub> -O <sub>64</sub> -C <sub>66</sub> | 120.621 | N <sub>14</sub> -Si <sub>41</sub> | 1.930 |                                                    |        |
| N <sub>32</sub> -Zn <sub>41</sub> | 1.992 | C <sub>35</sub> -O <sub>53</sub> -C <sub>54</sub> | 120.177 | N <sub>32</sub> -Si <sub>41</sub> | 1.930 |                                                    |        |
| <b>ZnPc 9C</b>                    |       |                                                   |         | <b>SiPc 9C</b>                    |       |                                                    |        |
| N <sub>5</sub> -Zn <sub>41</sub>  | 1.990 | C <sub>8</sub> -O <sub>86</sub> -C <sub>87</sub>  | 120.384 | N <sub>5</sub> -Si <sub>41</sub>  | 1.928 | Si <sub>41</sub> -O <sub>59</sub> -C <sub>69</sub> | 125.25 |
| N <sub>23</sub> -Zn <sub>41</sub> | 1.990 | C <sub>26</sub> -O <sub>65</sub> -C <sub>72</sub> | 120.206 | N <sub>23</sub> -Si <sub>41</sub> | 1.932 | Si <sub>41</sub> -O <sub>58</sub> -C <sub>60</sub> | 131.01 |
| N <sub>14</sub> -Zn <sub>41</sub> | 1.991 | C <sub>17</sub> -O <sub>64</sub> -C <sub>66</sub> | 120.621 | N <sub>14</sub> -Si <sub>41</sub> | 1.928 |                                                    |        |
| N <sub>32</sub> -Zn <sub>41</sub> | 1.992 | C <sub>35</sub> -O <sub>53</sub> -C <sub>54</sub> | 120.177 | N <sub>32</sub> -Si <sub>41</sub> | 1.931 |                                                    |        |
| <b>ZnPc 10C</b>                   |       |                                                   |         | <b>SiPc 10C</b>                   |       |                                                    |        |
| N <sub>5</sub> -Zn <sub>41</sub>  | 1.990 | C <sub>8</sub> -O <sub>86</sub> -C <sub>87</sub>  | 120.384 | N <sub>5</sub> -Si <sub>41</sub>  | 1.926 | Si <sub>41</sub> -O <sub>59</sub> -C <sub>69</sub> | 128.79 |
| N <sub>23</sub> -Zn <sub>41</sub> | 1.990 | C <sub>26</sub> -O <sub>65</sub> -C <sub>72</sub> | 120.206 | N <sub>23</sub> -Si <sub>41</sub> | 1.940 | Si <sub>41</sub> -O <sub>58</sub> -C <sub>60</sub> | 130.36 |
| N <sub>14</sub> -Zn <sub>41</sub> | 1.991 | C <sub>17</sub> -O <sub>64</sub> -C <sub>66</sub> | 120.621 | N <sub>14</sub> -Si <sub>41</sub> | 1.935 |                                                    |        |
| N <sub>32</sub> -Zn <sub>41</sub> | 1.992 | C <sub>35</sub> -O <sub>53</sub> -C <sub>54</sub> | 120.177 | N <sub>32</sub> -Si <sub>41</sub> | 1.939 |                                                    |        |
| <b>ZnPc 11C</b>                   |       |                                                   |         | <b>SiPc 11C</b>                   |       |                                                    |        |
| N <sub>5</sub> -Zn <sub>41</sub>  | 1.990 | C <sub>8</sub> -O <sub>86</sub> -C <sub>87</sub>  | 120.384 | N <sub>5</sub> -Si <sub>41</sub>  | 1.935 | Si <sub>41</sub> -O <sub>59</sub> -C <sub>69</sub> | 131.12 |
| N <sub>23</sub> -Zn <sub>41</sub> | 1.990 | C <sub>26</sub> -O <sub>65</sub> -C <sub>72</sub> | 120.206 | N <sub>23</sub> -Si <sub>41</sub> | 1.932 | Si <sub>41</sub> -O <sub>58</sub> -C <sub>60</sub> | 130.28 |
| N <sub>14</sub> -Zn <sub>41</sub> | 1.991 | C <sub>17</sub> -O <sub>64</sub> -C <sub>66</sub> | 120.621 | N <sub>14</sub> -Si <sub>41</sub> | 1.937 |                                                    |        |
| N <sub>32</sub> -Zn <sub>41</sub> | 1.992 | C <sub>35</sub> -O <sub>53</sub> -C <sub>54</sub> | 120.177 | N <sub>32</sub> -Si <sub>41</sub> | 1.932 |                                                    |        |

## S2. Electronic properties of metal phthalocyanines

Once the molecular structures were optimized, the electronic properties were calculated (B3LYP/6-31G(d,p) level of theory) in the solution phase using the CPCM solvent model and the solvent tetrahydrofuran as it has been used in the experimental reports. For a better understanding of the following results, Figure SIII shows the labels of the atoms of interest. The atomic charges are obtained from the natural population analysis (NPA), and Table SII shows the results all systems for both phthalocyanines. The results show that for

both metals, the carbon atoms bonded to both indole and aza nitrogen atoms (Figure SIII) have a positive charge while the remaining carbon atoms have a negative charge. Additionally, in both systems, the deficiency in charge also is extended to the carbon atoms bonded to the oxo bridges of the substituents, as well as on the carbons directly attached to the hydroxyls and oxygen of the anchor group.

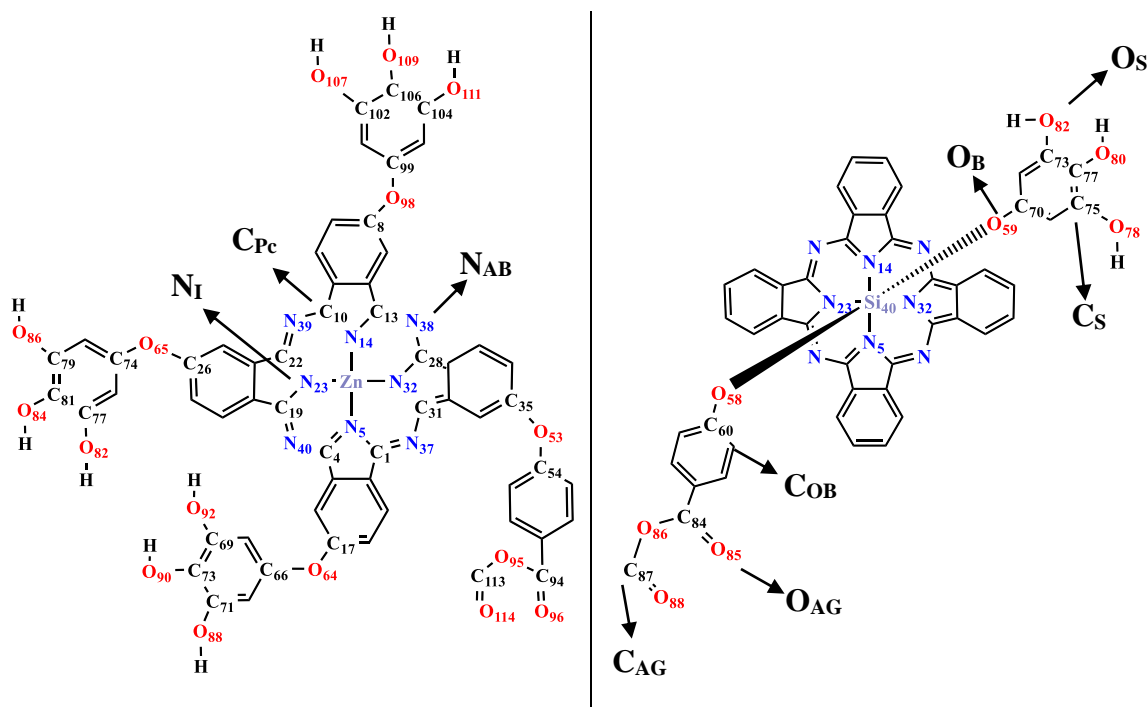

**Figure SIII.** Atoms labels for the MPCs. CAG: Anchor group carbon, CPC: Phthalocyanine carbon, COB: Oxygen bridge carbon, CS: Substituent carbon, NAB: Aza bridge nitrogen, OOB: Oxygen bridge, OAG: Anchor group oxygen, NI: Isoindolic nitrogen and OS: Substituent oxygen.

The values reported in Table SII show an intramolecular charge transfer that goes from carbon atoms to nitrogen atoms (indole, aza) and to the oxygen atoms in the systems. In the same way, all nitrogen atoms in both systems have a negative charge, with the indole nitrogen atoms having the highest negative charge, this trend was also found for the systems without substituents. In the case of **ZnPc**, the indole nitrogen atoms have a charge of -0.68, while those aza bridges have a value of -0.50. This shows that the metal directly affects the

macrocycle through charge donation. This effect is slightly greater in **SiPc** for indole nitrogen (-0.71) compared to their zinc homologous (-0.68). The values in Table 2 are for systems with both central atoms and an anhydrous anchor group (**1A**). However, the analysis was performed for all studied systems in which the same trend was found.

**Table SII.** Main NPA charges from substituents and macrocycle obtained by NBO calculations at the B3LYP/6-31G(d,p)/D3 level of theory.

| <b>ZnPc -1A</b> |          |             |                 |             | <b>SiPc-1A</b> |                 |          |             |                 |    |        |
|-----------------|----------|-------------|-----------------|-------------|----------------|-----------------|----------|-------------|-----------------|----|--------|
| <b>Atom</b>     | <b>Q</b> | <b>Atom</b> | <b>Q</b>        | <b>Atom</b> | <b>Q</b>       | <b>Atom</b>     | <b>Q</b> | <b>Atom</b> | <b>Q</b>        |    |        |
| C <sub>AG</sub> | 94       | 0.824       | C <sub>S</sub>  | 73          | 0.197          | C <sub>AG</sub> | 84       | 0.822       | N <sub>AB</sub> | 38 | -0.480 |
| C <sub>AG</sub> | 113      | 0.663       | N <sub>AB</sub> | 38          | -0.496         | C <sub>AG</sub> | 87       | 0.662       | N <sub>AB</sub> | 37 | -0.482 |
| C <sub>Pc</sub> | 19       | 0.445       | N <sub>AB</sub> | 37          | -0.498         | C <sub>Pc</sub> | 13       | 0.457       | N <sub>AB</sub> | 39 | -0.487 |
| C <sub>Pc</sub> | 1        | 0.439       | N <sub>AB</sub> | 39          | -0.501         | C <sub>Pc</sub> | 28       | 0.455       | O <sub>AG</sub> | 85 | -0.567 |
| C <sub>Pc</sub> | 22       | 0.442       | N <sub>AB</sub> | 40          | -0.502         | C <sub>Pc</sub> | 10       | 0.455       | O <sub>AG</sub> | 88 | -0.573 |
| C <sub>Pc</sub> | 4        | 0.441       | O <sub>OB</sub> | 53          | -0.505         | C <sub>Pc</sub> | 1        | 0.452       | O <sub>AG</sub> | 86 | -0.590 |
| C <sub>Pc</sub> | 10       | 0.441       | O <sub>OB</sub> | 64          | -0.514         | C <sub>Pc</sub> | 19       | 0.454       | N <sub>I</sub>  | 32 | -0.703 |
| C <sub>Pc</sub> | 13       | 0.435       | O <sub>OB</sub> | 98          | -0.514         | C <sub>Pc</sub> | 31       | 0.454       | O <sub>S</sub>  | 78 | -0.705 |
| C <sub>Pc</sub> | 28       | 0.431       | O <sub>OB</sub> | 65          | -0.515         | C <sub>Pc</sub> | 4        | 0.452       | O <sub>S</sub>  | 82 | -0.705 |
| C <sub>Pc</sub> | 31       | 0.430       | O <sub>AG</sub> | 96          | -0.565         | C <sub>Pc</sub> | 22       | 0.451       | N <sub>I</sub>  | 5  | -0.705 |
| COB             | 54       | 0.347       | O <sub>AG</sub> | 114         | -0.566         | COB             | 60       | 0.367       | N <sub>I</sub>  | 14 | -0.707 |
| COB             | 26       | 0.324       | O <sub>AG</sub> | 95          | -0.590         | COB             | 70       | 0.343       | N <sub>I</sub>  | 23 | -0.708 |
| COB             | 17       | 0.320       | N <sub>I</sub>  | 32          | -0.676         | C <sub>S</sub>  | 75       | 0.309       | O <sub>S</sub>  | 80 | -0.763 |
| COB             | 8        | 0.319       | N <sub>I</sub>  | 14          | -0.680         | C <sub>S</sub>  | 73       | 0.308       | O <sub>OB</sub> | 58 | -0.867 |
| C <sub>S</sub>  | 102      | 0.301       | N <sub>I</sub>  | 5           | -0.681         | C <sub>S</sub>  | 77       | 0.136       | O <sub>OB</sub> | 59 | -0.888 |
| C <sub>S</sub>  | 71       | 0.301       | N <sub>I</sub>  | 23          | -0.683         | N <sub>AB</sub> | 40       | -0.480      |                 |    |        |
| C <sub>S</sub>  | 77       | 0.299       | O <sub>S</sub>  | 82          | -0.702         |                 |          |             |                 |    |        |
| COB             | 99       | 0.294       | O <sub>S</sub>  | 107         | -0.702         |                 |          |             |                 |    |        |
| COB             | 66       | 0.294       | O <sub>S</sub>  | 88          | -0.702         |                 |          |             |                 |    |        |
| COB             | 35       | 0.290       | O <sub>S</sub>  | 86          | -0.723         |                 |          |             |                 |    |        |
| COB             | 74       | 0.289       | O <sub>S</sub>  | 92          | -0.723         |                 |          |             |                 |    |        |
| C <sub>S</sub>  | 79       | 0.281       | O <sub>S</sub>  | 111         | -0.723         |                 |          |             |                 |    |        |
| C <sub>S</sub>  | 69       | 0.280       | O <sub>S</sub>  | 84          | -0.729         |                 |          |             |                 |    |        |
| C <sub>S</sub>  | 104      | 0.280       | O <sub>S</sub>  | 109         | -0.730         |                 |          |             |                 |    |        |
| C <sub>S</sub>  | 81       | 0.199       | O <sub>S</sub>  | 90          | -0.730         |                 |          |             |                 |    |        |

| <b>NBO Charges ZnPc-1B</b> |          |             |                 |             | <b>NBO Charges ZnPc-1C</b> |                 |          |             |                 |     |        |
|----------------------------|----------|-------------|-----------------|-------------|----------------------------|-----------------|----------|-------------|-----------------|-----|--------|
| <b>Atom</b>                | <b>Q</b> | <b>Atom</b> | <b>Q</b>        | <b>Atom</b> | <b>Q</b>                   | <b>Atom</b>     | <b>Q</b> | <b>Atom</b> | <b>Q</b>        |     |        |
| C <sub>AG</sub>            | 94       | 0.825       | C <sub>S</sub>  | 107         | 0.197                      | C <sub>Pc</sub> | 28       | 0.439       | C <sub>S</sub>  | 101 | 0.196  |
| C <sub>Pc</sub>            | 19       | 0.444       | N <sub>AB</sub> | 38          | -0.496                     | C <sub>Pc</sub> | 10       | 0.439       | C <sub>S</sub>  | 79  | 0.195  |
| C <sub>Pc</sub>            | 22       | 0.441       | N <sub>AB</sub> | 37          | -0.498                     | C <sub>Pc</sub> | 1        | 0.438       | N <sub>AB</sub> | 40  | -0.500 |

|                 |     |       |                 |     |        |                 |    |       |                 |     |        |
|-----------------|-----|-------|-----------------|-----|--------|-----------------|----|-------|-----------------|-----|--------|
| C <sub>Pc</sub> | 10  | 0.441 | N <sub>AB</sub> | 39  | -0.500 | C <sub>Pc</sub> | 19 | 0.438 | N <sub>AB</sub> | 39  | -0.500 |
| C <sub>Pc</sub> | 4   | 0.440 | N <sub>AB</sub> | 40  | -0.502 | C <sub>Pc</sub> | 13 | 0.437 | N <sub>AB</sub> | 37  | -0.500 |
| C <sub>Pc</sub> | 1   | 0.439 | O <sub>OB</sub> | 53  | -0.509 | C <sub>Pc</sub> | 31 | 0.437 | N <sub>AB</sub> | 38  | -0.501 |
| C <sub>Pc</sub> | 13  | 0.435 | O <sub>OB</sub> | 64  | -0.514 | C <sub>Pc</sub> | 22 | 0.436 | O <sub>OB</sub> | 62  | -0.514 |
| C <sub>Pc</sub> | 28  | 0.432 | O <sub>OB</sub> | 99  | -0.514 | C <sub>Pc</sub> | 4  | 0.436 | O <sub>OB</sub> | 93  | -0.514 |
| C <sub>Pc</sub> | 31  | 0.431 | O <sub>OB</sub> | 65  | -0.514 | C <sub>OB</sub> | 35 | 0.319 | O <sub>OB</sub> | 63  | -0.515 |
| C <sub>OB</sub> | 54  | 0.338 | O <sub>AG</sub> | 97  | -0.613 | C <sub>OB</sub> | 17 | 0.318 | O <sub>OB</sub> | 53  | -0.515 |
| C <sub>OB</sub> | 17  | 0.321 | N <sub>I</sub>  | 32  | -0.676 | C <sub>OB</sub> | 8  | 0.318 | N <sub>I</sub>  | 5   | -0.681 |
| C <sub>OB</sub> | 26  | 0.320 | N <sub>I</sub>  | 14  | -0.680 | C <sub>OB</sub> | 26 | 0.315 | N <sub>I</sub>  | 23  | -0.681 |
| C <sub>OB</sub> | 8   | 0.319 | N <sub>I</sub>  | 5   | -0.681 | C <sub>S</sub>  | 97 | 0.301 | N <sub>I</sub>  | 14  | -0.681 |
| C <sub>S</sub>  | 103 | 0.301 | N <sub>I</sub>  | 23  | -0.682 | C <sub>S</sub>  | 69 | 0.301 | N <sub>I</sub>  | 32  | -0.681 |
| C <sub>S</sub>  | 71  | 0.301 | O <sub>S</sub>  | 82  | -0.702 | C <sub>S</sub>  | 75 | 0.300 | O <sub>S</sub>  | 80  | -0.702 |
| C <sub>S</sub>  | 77  | 0.300 | O <sub>S</sub>  | 108 | -0.702 | C <sub>OB</sub> | 72 | 0.296 | O <sub>S</sub>  | 86  | -0.702 |
| C <sub>OB</sub> | 100 | 0.294 | O <sub>S</sub>  | 88  | -0.702 | C <sub>OB</sub> | 94 | 0.296 | O <sub>S</sub>  | 102 | -0.702 |
| C <sub>OB</sub> | 66  | 0.294 | O <sub>AG</sub> | 95  | -0.717 | C <sub>OB</sub> | 64 | 0.295 | O <sub>AG</sub> | 108 | -0.708 |
| C <sub>OB</sub> | 74  | 0.292 | O <sub>S</sub>  | 92  | -0.723 | C <sub>S</sub>  | 77 | 0.282 | O <sub>S</sub>  | 90  | -0.723 |
| C <sub>OB</sub> | 35  | 0.290 | O <sub>S</sub>  | 112 | -0.723 | C <sub>S</sub>  | 99 | 0.280 | O <sub>S</sub>  | 106 | -0.723 |
| C <sub>S</sub>  | 79  | 0.281 | O <sub>S</sub>  | 86  | -0.723 | C <sub>S</sub>  | 67 | 0.280 | O <sub>S</sub>  | 84  | -0.723 |
| C <sub>S</sub>  | 69  | 0.280 | O <sub>S</sub>  | 84  | -0.730 | C <sub>OB</sub> | 54 | 0.276 | O <sub>AG</sub> | 111 | -0.725 |
| C <sub>S</sub>  | 105 | 0.280 | O <sub>S</sub>  | 90  | -0.730 | C <sub>AG</sub> | 59 | 0.269 | O <sub>S</sub>  | 88  | -0.730 |
| C <sub>S</sub>  | 81  | 0.198 | O <sub>S</sub>  | 110 | -0.730 | C <sub>AG</sub> | 61 | 0.269 | O <sub>S</sub>  | 104 | -0.730 |
| C <sub>S</sub>  | 73  | 0.197 |                 |     |        | C <sub>S</sub>  | 71 | 0.197 | O <sub>S</sub>  | 82  | -0.730 |

| NBO Charges SiPc-1B |    |        |                 |           |
|---------------------|----|--------|-----------------|-----------|
| Atom                | Q  | Atom   | Q               |           |
| C <sub>AG</sub>     | 84 | 0.821  | N <sub>AB</sub> | 38 -0.481 |
| C <sub>Pc</sub>     | 13 | 0.456  | N <sub>AB</sub> | 37 -0.483 |
| C <sub>Pc</sub>     | 28 | 0.455  | N <sub>AB</sub> | 39 -0.486 |
| C <sub>Pc</sub>     | 10 | 0.454  | O <sub>AG</sub> | 85 -0.638 |
| C <sub>Pc</sub>     | 19 | 0.454  | N <sub>I</sub>  | 32 -0.703 |
| C <sub>Pc</sub>     | 31 | 0.453  | N <sub>I</sub>  | 5 -0.704  |
| C <sub>Pc</sub>     | 4  | 0.453  | N <sub>I</sub>  | 14 -0.705 |
| C <sub>Pc</sub>     | 1  | 0.452  | O <sub>S</sub>  | 78 -0.705 |
| C <sub>Pc</sub>     | 22 | 0.452  | N <sub>I</sub>  | 23 -0.705 |
| C <sub>OB</sub>     | 60 | 0.355  | O <sub>S</sub>  | 82 -0.705 |
| C <sub>OB</sub>     | 70 | 0.343  | O <sub>AG</sub> | 86 -0.724 |
| C <sub>S</sub>      | 75 | 0.308  | O <sub>S</sub>  | 80 -0.764 |
| C <sub>S</sub>      | 73 | 0.308  | O <sub>OB</sub> | 58 -0.874 |
| C <sub>S</sub>      | 77 | 0.136  | O <sub>OB</sub> | 59 -0.887 |
| N <sub>AB</sub>     | 40 | -0.481 |                 |           |

| NBO Charges SiPc-1C |    |       |                 |           |
|---------------------|----|-------|-----------------|-----------|
| Atom                | Q  | Atom  | Q               |           |
| C <sub>Pc</sub>     | 28 | 0.455 | N <sub>AB</sub> | 40 -0.482 |
| C <sub>Pc</sub>     | 13 | 0.455 | N <sub>AB</sub> | 38 -0.482 |
| C <sub>Pc</sub>     | 4  | 0.454 | N <sub>AB</sub> | 37 -0.486 |
| C <sub>Pc</sub>     | 19 | 0.453 | N <sub>AB</sub> | 39 -0.486 |
| C <sub>Pc</sub>     | 1  | 0.453 | N <sub>I</sub>  | 23 -0.699 |
| C <sub>Pc</sub>     | 31 | 0.452 | N <sub>I</sub>  | 32 -0.700 |
| C <sub>Pc</sub>     | 10 | 0.452 | N <sub>I</sub>  | 14 -0.700 |
| C <sub>Pc</sub>     | 22 | 0.451 | N <sub>I</sub>  | 5 -0.701  |
| C <sub>OB</sub>     | 69 | 0.345 | O <sub>S</sub>  | 77 -0.705 |
| C <sub>OB</sub>     | 60 | 0.311 | O <sub>S</sub>  | 81 -0.706 |
| C <sub>S</sub>      | 74 | 0.307 | O <sub>AG</sub> | 85 -0.709 |
| C <sub>S</sub>      | 72 | 0.307 | O <sub>AG</sub> | 83 -0.735 |
| C <sub>AG</sub>     | 65 | 0.286 | O <sub>S</sub>  | 79 -0.764 |
| C <sub>AG</sub>     | 67 | 0.234 | O <sub>OB</sub> | 59 -0.886 |
| C <sub>S</sub>      | 76 | 0.135 | O <sub>OB</sub> | 58 -0.891 |

$C_{AG}$ : Anchor group carbon,  $C_{Pc}$ : Phthalocyanine carbon,  $C_{OB}$ : Oxygen bridge carbon,  $C_S$ : Substituent carbon,  $N_{AB}$ : Aza bridge nitrogen,  $O_{OB}$ : Oxygen bridge,  $O_{AG}$ : Anchor group oxygen,  $N_I$ : Isoindolic nitrogen and  $O_S$ : Substituent oxygen.

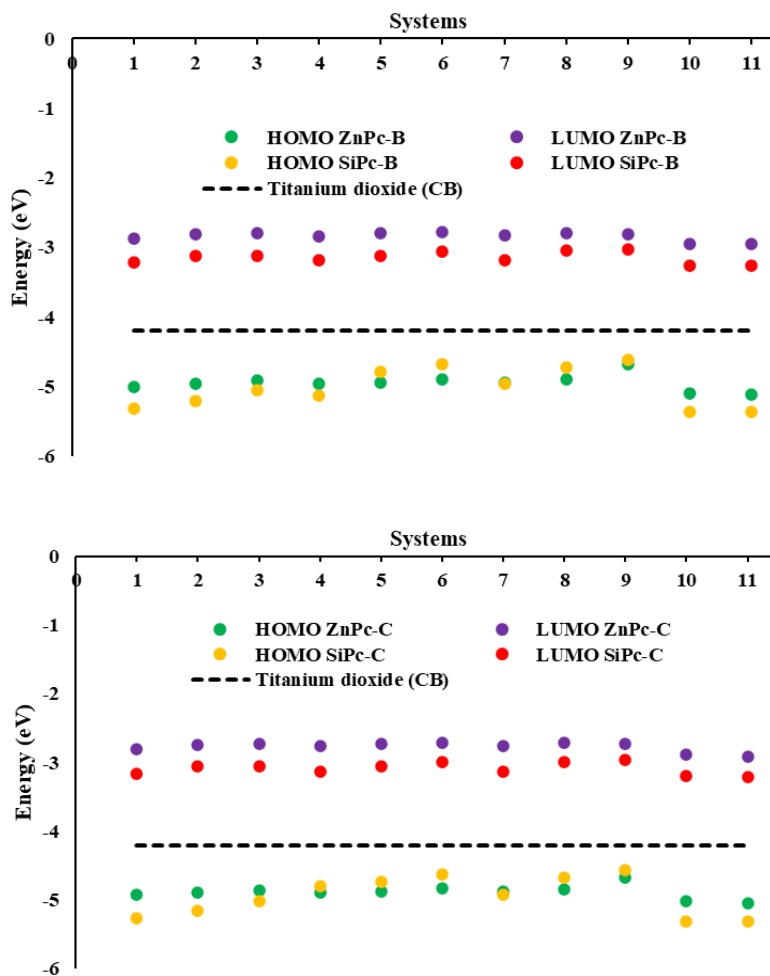

**Figure S1.** Energy values of the frontier molecular orbitals for ZnPc y SiPc with carboxyl (B) and catechol (C) anchoring groups.

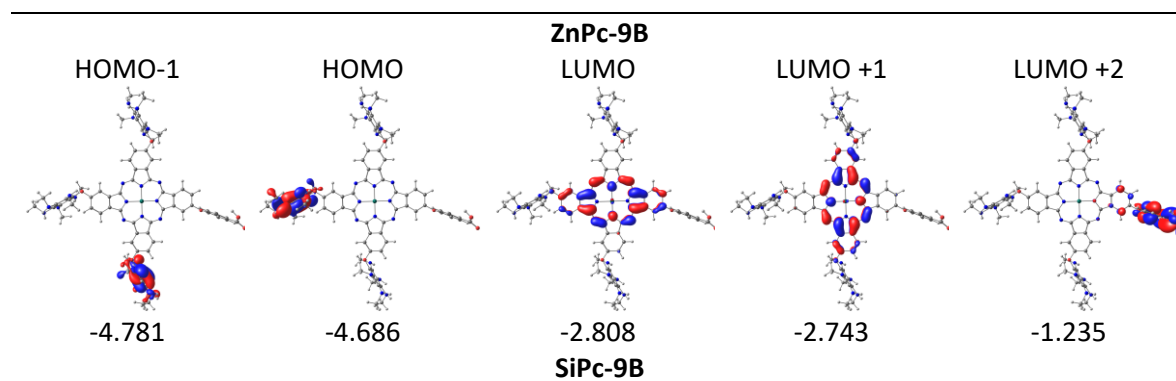

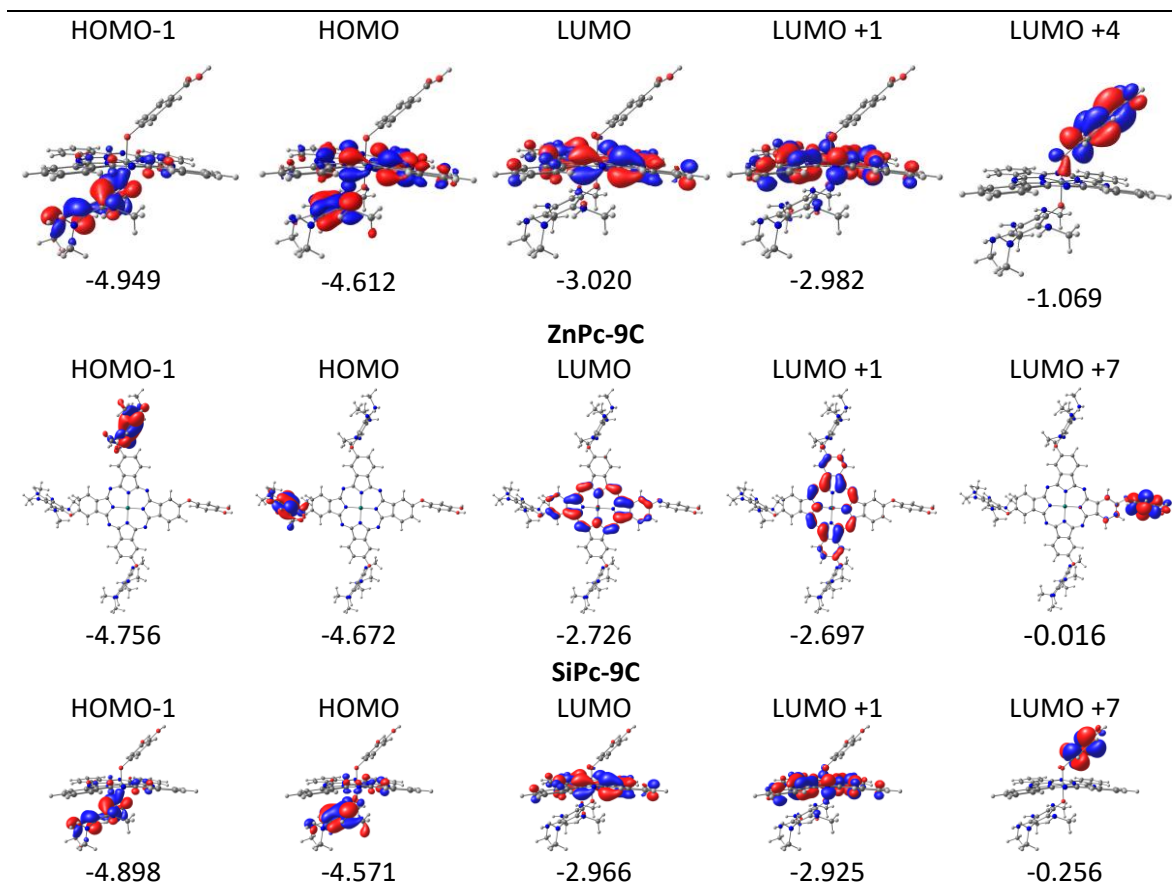

**Figure S2.** Surfaces of frontier molecular orbitals for **9B** (carboxyl anchor group) and **9C** (catechol anchor group) calculated in the solution phase.

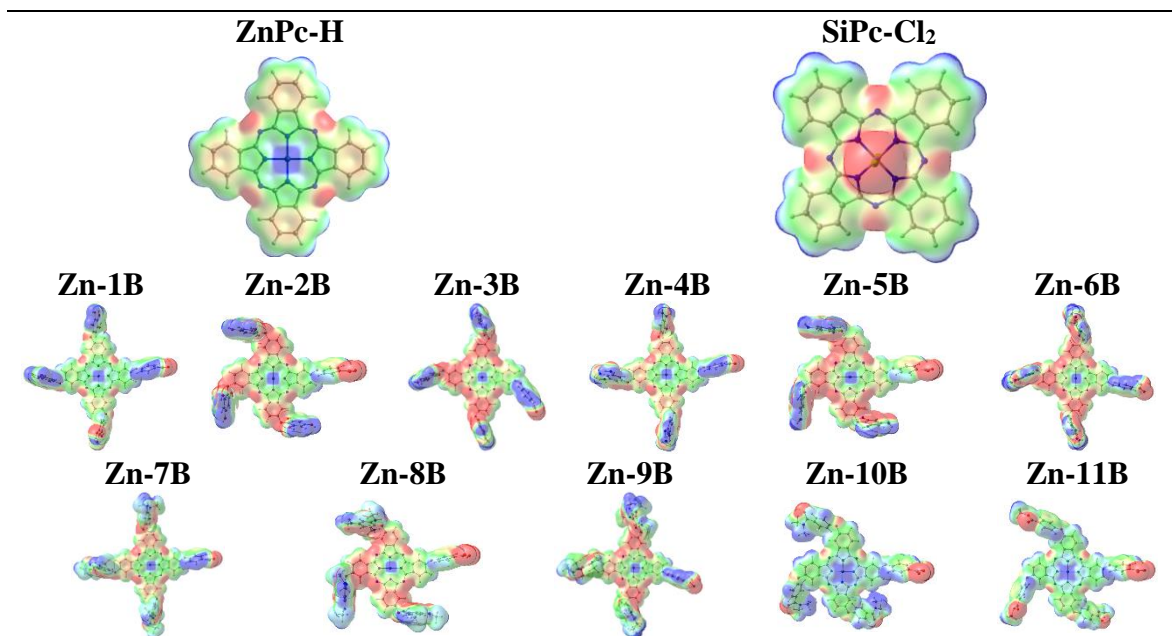

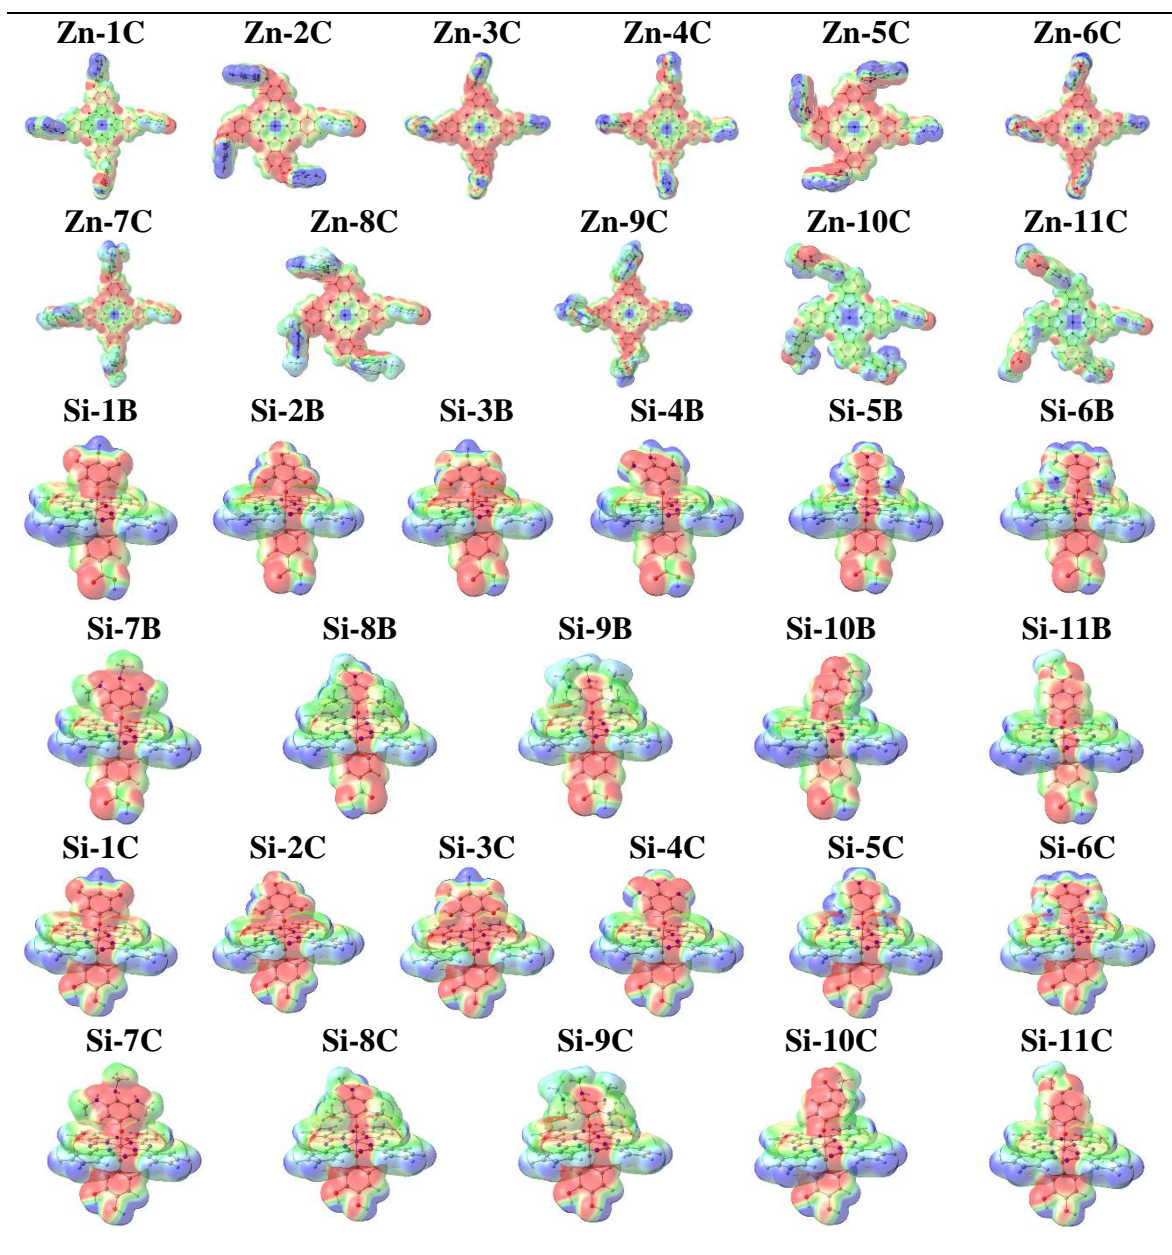

**Figure S3.** Surfaces of molecular electrostatic potential mapped into the charge density isosurface of 0.002 electrons/bohr<sup>3</sup> for MPcs with carboxyl (B) and catechol (C) anchoring group and without substituents.



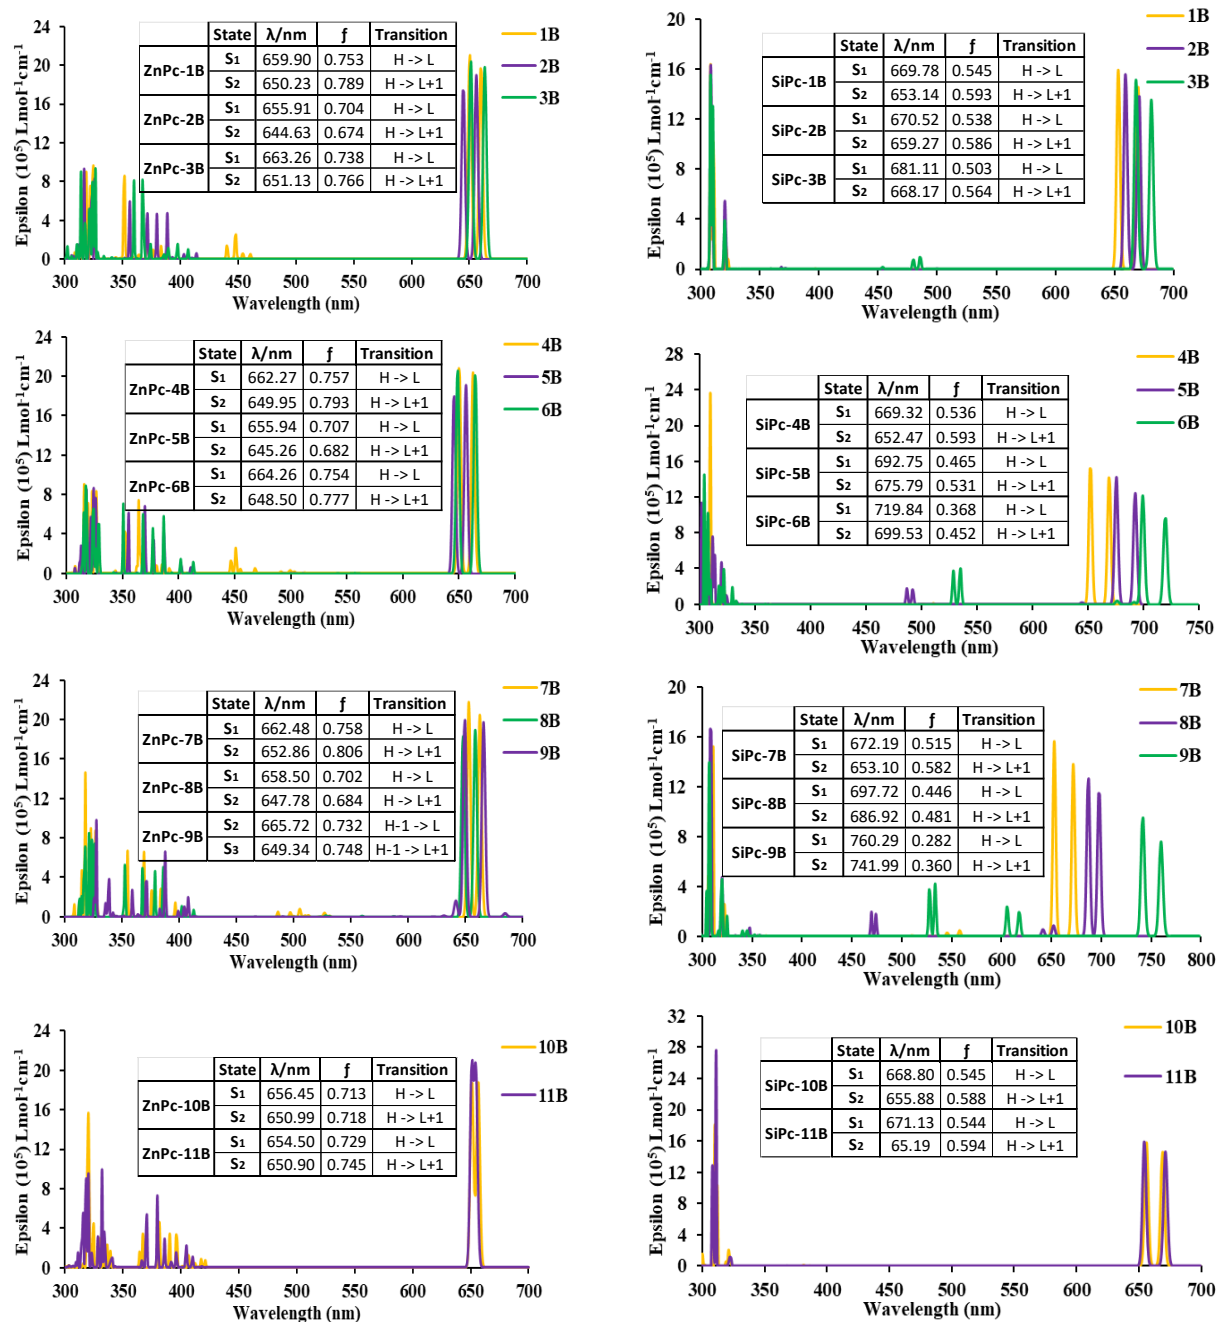

**Figure S4.** UV-Vis spectra calculated by TD-DFT with the **carboxyl anchor group** as the anchoring group. Left: ZnPc, Right: SiPc. The excitations corresponding to the Q-band region are included in the center of the figure.

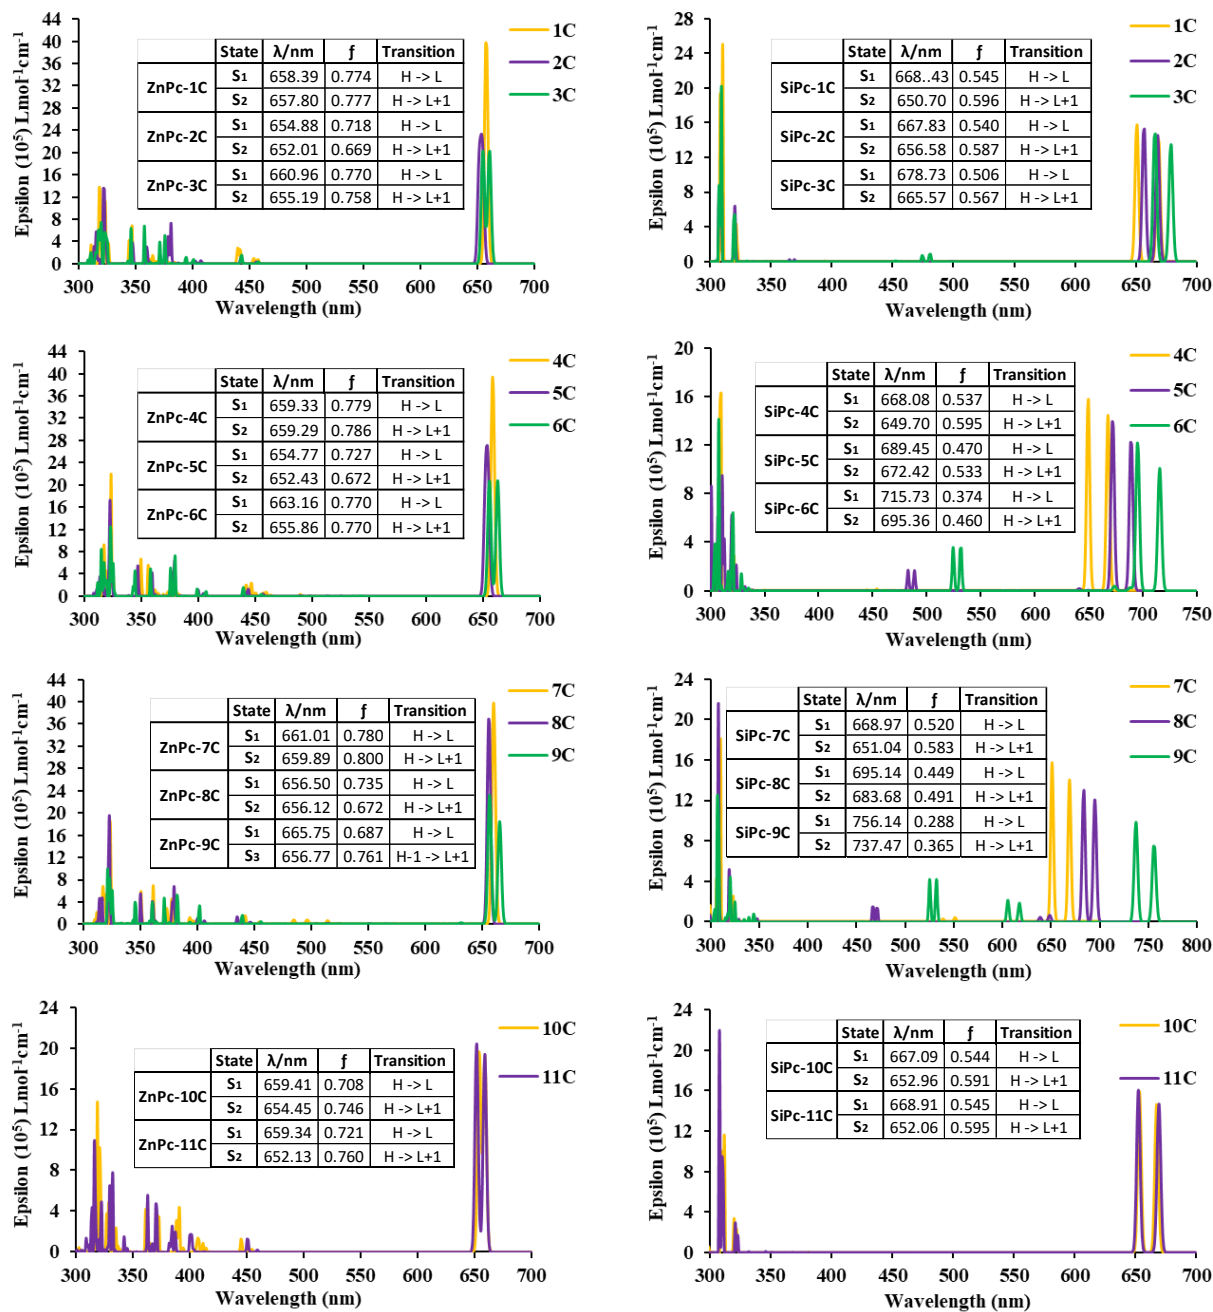

**Figure S5.** UV-Vis spectra calculated by TD-DFT with the **catechol anchor group** as the anchoring group. Left: ZnPc, Right: SiPc. The excitations corresponding to the Q-band region are included in the center of the figure.

**Table S1.** Adsorption ( $E_{\text{ads}}$ ) and interaction ( $E_{\text{int}}$ ) energies calculated at the molecular level at the GGA-PBE/Double  $\zeta$  basis set/PseudDojo theory level.

| ZnPc             | 1A     | 2A     | 3A     | 4A     | 5A     | 6A     | 7A     | 8A     | 9A     | 10A    | 11A    |
|------------------|--------|--------|--------|--------|--------|--------|--------|--------|--------|--------|--------|
| $E_{\text{ads}}$ | -1.211 | -0.946 | -0.993 | -1.111 | -1.252 | -1.335 | -1.314 | -1.307 | -1.588 | -1.320 | -1.036 |
| $E_{\text{int}}$ | -1.482 | -1.367 | -1.440 | -1.447 | -1.524 | -1.729 | -1.595 | -1.639 | -1.891 | -1.616 | -1.339 |
| ZnPc             | 1B     | 2B     | 3B     | 4B     | 5B     | 6B     | 7B     | 8B     | 9B     | 10B    | 11B    |
| $E_{\text{ads}}$ | -0.827 | -0.648 | -0.696 | -0.646 | -0.678 | -1.566 | -0.880 | -1.139 | -1.100 | -0.610 | -2.851 |
| $E_{\text{int}}$ | -4.522 | -3.940 | -3.890 | -3.813 | -3.813 | -3.992 | -4.381 | -3.891 | -3.994 | -3.973 | -3.979 |
| SiPc             | 1A     | 2A     | 3A     | 4A     | 5A     | 6A     | 7A     | 8A     | 9A     | 10A    | 11A    |
| $E_{\text{ads}}$ | -1.639 | -1.900 | -1.721 | -1.788 | -2.063 | -2.065 | -1.627 | -1.760 | -1.531 | -1.790 | -1.538 |
| $E_{\text{int}}$ | -2.102 | -2.264 | -2.128 | -2.078 | -2.444 | -2.502 | -2.065 | -2.161 | -1.907 | -2.206 | -2.046 |
| SiPc             | 1B     | 2B     | 3B     | 4B     | 5B     | 6B     | 7B     | 8B     | 9B     | 10B    | 11B    |
| $E_{\text{ads}}$ | -0.988 | -1.036 | -1.052 | -1.039 | -1.156 | -1.320 | -1.135 | -1.185 | -1.051 | -0.989 | -1.095 |
| $E_{\text{int}}$ | -4.911 | -4.681 | -4.633 | -4.518 | -4.836 | -4.555 | -4.576 | -4.641 | -4.590 | -4.765 | -4.610 |

**Table S2.** Comparison of some properties for systems adsorbed on different TiO<sub>2</sub> surfaces.

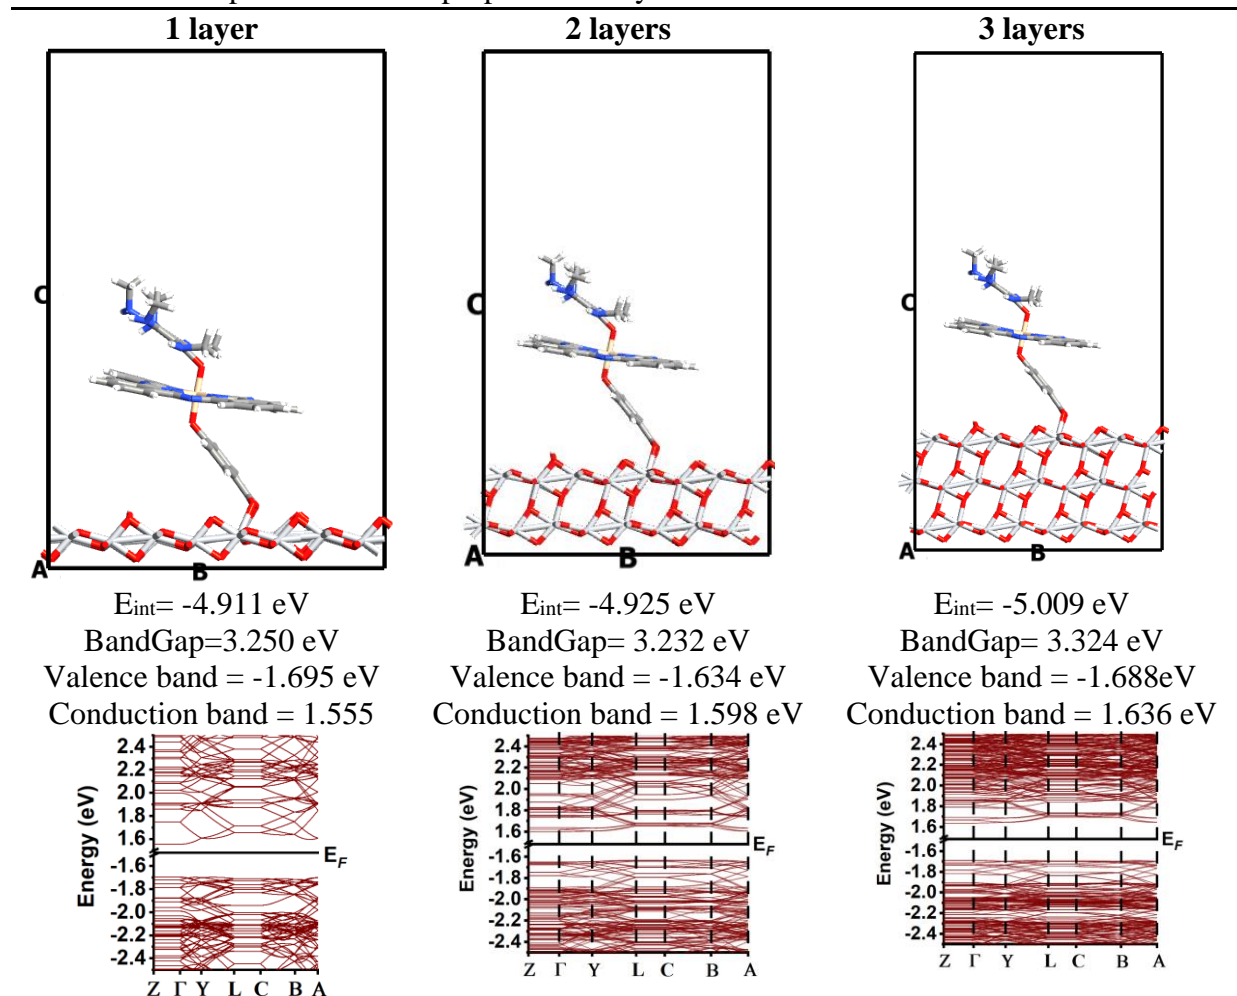

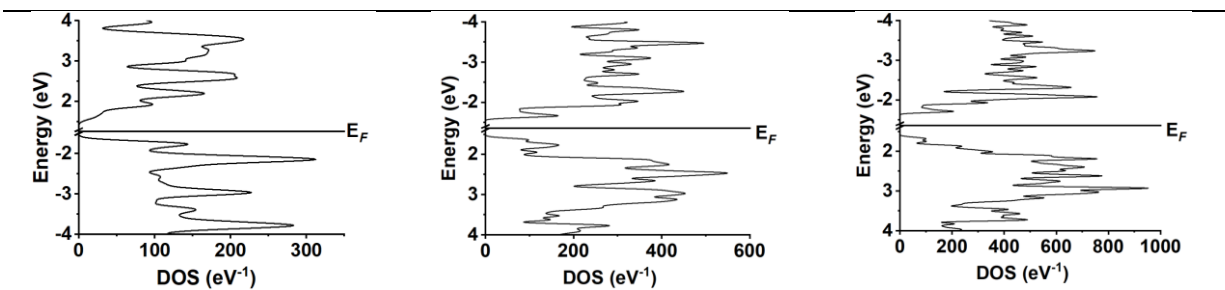

The calculation involved testing systems with one, two, and three semiconductor layers ( $\text{TiO}_2$ ), comprising 253, 397, and 541 atoms, respectively. As seen in Table S2, interaction energies exhibited minimal changes, with the largest variation being 0.098 eV, observed between the single-layer and three-layer systems. Similarly, the energy band gap displayed no significant fluctuations, with the highest value recorded for the three-layer system at 3.324 eV and the lowest for the two-layer system at 3.232 eV. However, this difference remained below 0.1 eV, indicating marginal variation.

In the evaluation of band structure and density of states (DOS) for each surface, the analysis revealed that valence and conduction bands experienced negligible variations across different systems. The valence band ranged from -1.695 to -1.634 eV, while the conduction band ranged from 1.555 to 1.636 eV. In both cases, the variations were less than 0.1 eV, demonstrating convergence in these values concerning system size.

The main distinction lies in the number of bands in the band structure, resulting in a higher density of states as the system size increases. This increase stemmed from the greater number of atoms in the systems, leading to a higher count of electrons. Nevertheless, despite this, the band structure and DOS trend remained similar across the evaluated systems.

Consequently, the decision was made to focus on studying and analyzing adsorbed systems on the surface of one single layer. This choice was motivated by the lower number of atoms

in these systems, resulting in calculations that are more computationally efficient in terms of time and resources.

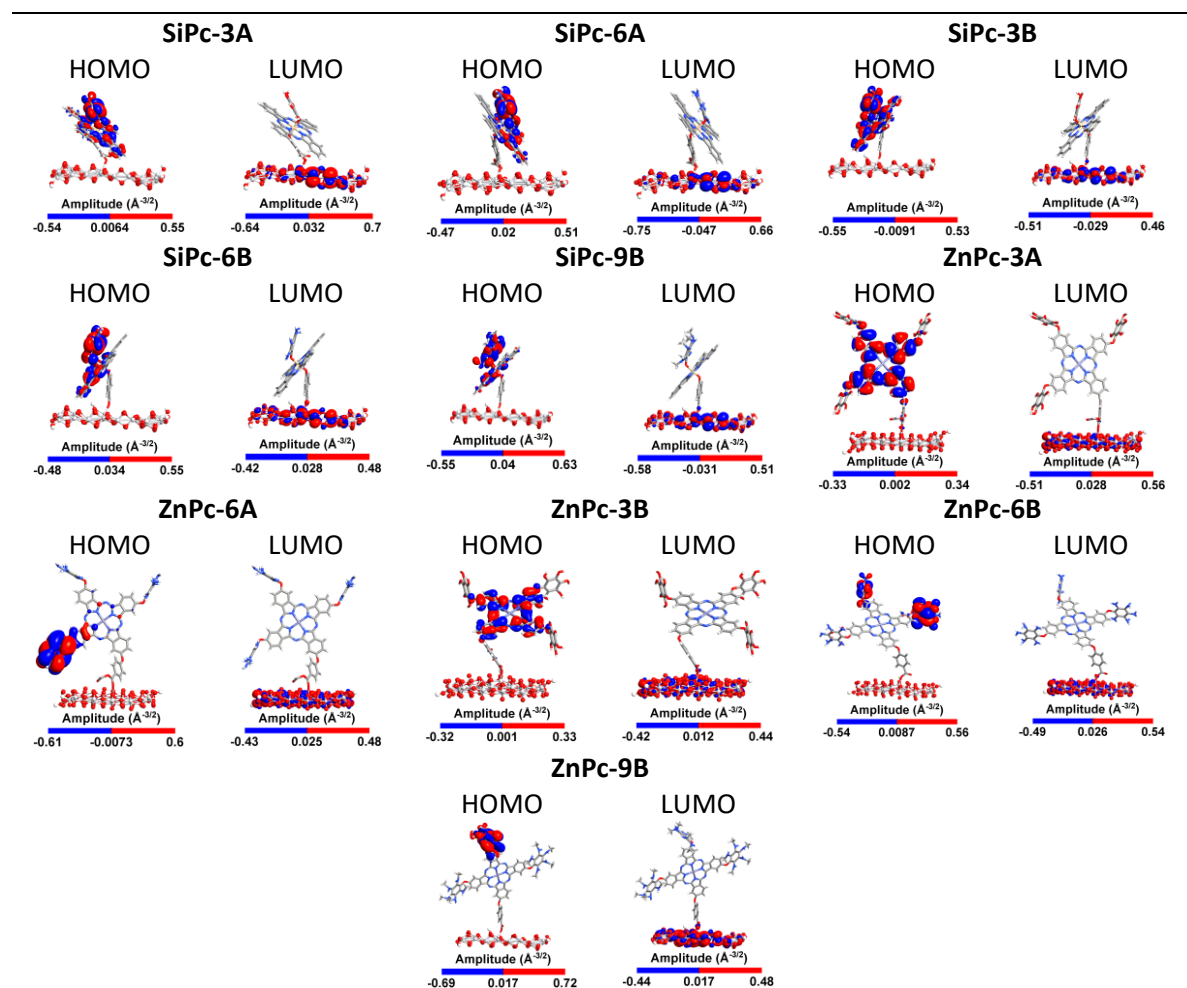

**Figure S6.** Surfaces of the frontier molecular orbitals calculated for the interaction dye-TiO<sub>2</sub>.
